# Supplementary material for: Energetic demands regulate sleep-wake rhythm circuit development
Source: eLife. 2024 Jul 22;13:RP97256. doi: 10.7554/eLife.97256 (PMC11262794; doi:10.7554/eLife.97256)
Supplement: Figure 1—figure supplement 1—source data 1. [file elife-97256-fig1-figsupp1-data1.xlsx]

## Sheet: A
L2 CT0	L2 CT12	L3 CT0	L3 CT12	L3 L.S. CT1	L3 L.S. CT12
0.754	1.992	1.84	2.09	3.021	3.358
0.816	3.606	3.417	1.635	1.142	3.234
0.225	3.451	3.241	0.247	3.063	0.764
1.051	1.486	1.848	2.556	2.599
0.815	0.485	2.514	1.361		2.004
1.344	1.761	3.215	1.169	3.115	2.601
0.125	2.308	2.522	1.236	3.139	3.335
0.199	0.321	3.186	2.208	1.645	3.503
1.868	1.659	2.399	2.297	0.954
0.327	1.41	1.788	0.495	2.271	2.163
0.199	0.115	2.647	2.501	1.291	2.427
2.459	1.092	3.288	0.464	0.987	3.264
1.071	1.662	3.224	0.28	3.395	3.329
1.057	0.842	2.359	2.131	2.729	1.103
0.078	0.014	1.829	0.625	3.304	3.373
				3.315	3.251
				3.149	3.281
				3.214	3.21

## Sheet: B
Reg CT1	Reg CT13	LS CT1	LS CT13
5	64	32	30
26	43	41	18
65	92	6	12
23	66	30	49
29	75	22	46
	35	70	45
	64	42	26
55	24
	21	17
23		44	32
		63	23
		54	30
25	62	59
10	46	65	11
65		17	59
12	29	45	48
4	34	78	35
	68	54
37	78
28	52
61	53
30		51	46
		23	36
		30	19
24	48		36
29	29	43	40
17		34	31
17		33	47
0	40	29	40
36	24	57	21
64	53	65
68	34	37	16
30	66	67	96
21	46	24	37
22	37	18	37
2	48		32
38	54		75
36	49	46	53
		27	82
		63
		50
17	27
57	4
2	50
45
30
47

## Sheet: C
Reg CT1	Reg CT13	LS CT1	LS CT13
8.4	33.38	18.94	19.8
9	44.37	23.85	10.33
13.85	21.39	10	30
10.7	18.18	17.4	12.49
13.03	22.88	9.27	38.09
	47.31	14.06	38.27
	24.09	31.71	11.77
28.04	45.25
	54.29
25.3
		10.24
		31.36	9.94
10.56	15.48	11.62	37.3
9.6	15.39	37.11	61.6
13.38		16.58	24.33
17	21.72	11.45
9	21.53	12.71	15.05
	25.76	54.53	15.25
17.84	15.77	12.77	44.4
27.64	15.69	11.44
29.31	45.4
15.2
		19.88	37.04
		24.52	17.5
11.5	38.13	10.4	9.79
16.97	40.97		13.17
31.06		16.19	25.5
19.06		19.94	26.52
0	35.85	19.82	31.53
29.67	32.75	41.38	11.7
18.66	33.17	17.05	10.86
		21.69
14.38	12	31.3	6.75
14.4	20.09	16.93	13.94
16.86	30.91	11.5	23.35
19.36	46.05	11.33	16.54
6	30.38		32.63
31.42	16.78		13.04
23	13.59	15.13	24
		11.78	12.59
		20.76
		34.92
9.18	14.22
20.63	13.5
6	32.04
12.93
12.2
12.89

## Sheet: D
Reg	LS
2.6	3.4
2.1	2.5
2.3	2.1
2.7	2.3
2.3	3
2	2.7

## Sheet: E
Regular	L.S.
88.092	70.114
65.088	63.063
66.851	68.877
72.272	80.61
66.922	83.416
57.489	63.287
68.529	57.658
61.484	77.708
60.877	65.324
60.879	63.941
65.742	68.648
60.351	64.647
55.698	73.255
62.163	97.325
71.023	68.39
85.44	59.601
77.666	70.456
76.118	75.804
87.658	68.244
90.471	80.039
75.664	82.683
76.322	77.138
81.633	69.717
69.116	83.206
72.069	74.862
71.197	66.5
66.098	66.002
82.807	70.516
65.368	75.824
84.024	67.119
58.249	59.076
85.235	69.989
75.06	70.401
	66.727
	69.893
	61.057
	71.805
	63.885
	74.547
	87.506

## Sheet: F
reg					L.S
0	0	0	0		0	0	0
24	0	0	0		0	0	0
48	0	0	0		0	0	0
72	0	0	0		0	0	0
96	0	0	0		0	0	0
120	8.90052	25.4777	35.2518		37.2549	25.2252	35.2941
144	85.8639	87.2612	89.2086		98.0392	88.2883	92.6471
168	100	100	100		100	100	100

## Sheet: G
Reg L3	L.S.
0.428571	0.684211
0.75	0.52381
0.6	0.5
0.578947	0.578947
0.363636	0.789474
0.454545	0.411765

## Sheet: H
Reg L3	L.S.
0.882353	0.8
0.5	0.55
0.652174	0.5
0.578947	0.5
0.684211	0.789474
0.428571	0.5

## Sheet: I
Reg L3	L.S.
-0.684211	-0.809524
-0.714286	-0.5
-0.666667	-0.7
-0.76	-0.578947
-0.545454	-0.894737
-0.545454	-0.777778
