# Supplementary material for: Energetic demands regulate sleep-wake rhythm circuit development
Source: eLife. 2024 Jul 22;13:RP97256. doi: 10.7554/eLife.97256 (PMC11262794; doi:10.7554/eLife.97256)
Supplement: Figure 1—source data 1. [file elife-97256-fig1-data1.xlsx]

## Sheet: A
L2 CT1	L2 CT13	L2 CT7	L2 CT19
80	66	58	26
72	54	25	111
151	43	10	74
94	50	41	114
48	45	129	12
50	72	9	85
57	62	6	69
		13	212
34		43	19
71	83	19	43
58	36	22	11
76	42	51	126
27	38	40	45
30	51	84	2
71	40	142	0
65	56	84	56
39	52	199	84
72	45	88	44
		96	21
		73	12

## Sheet: B
L3 CT1	L3 CT7	L3 CT13	L3 CT19
12	92	104	28
53	53	5	16
21	51	90	10
171	114	38	12
107	74	27	6
96	103	54	9
	91	12	37
116	45	28	55
21	76		6
29	56	72	14
80	221		10
36	57	79	19
77	120	68	33
52	42	59	29
59	58		20
125	179	47	112
	20	44	53
132	64	11	29
74	223
84	49	32
66	50	36
		40
		22

## Sheet: C
tim CT1	tim CT13	tim CT7	tim CT19
79	11	92	30
45	37	25	77
29	7	41	68
44	51	94	92
37	77	162	84
33	21	99	57
50	51	87	21
12	180	31	50
35	73	107	37
102	18	44	13
8	23	34	50
55	98	39	29
74	52	59	13
36	10	32	32
29	14	5	58
9	38	129	67
31	42	86	49
155	31	60	25
148	13	144	44
46	44	61	21

## Sheet: D
LS CT1	LS CT13	LS CT7	LS CT19
39	18	86	36
60	45	2	30
101	51	53	42
81	39	61	50
52	62	30	74
57	38	77	39
74	64	15	52
47	76	20	62
60	51	12	67
57	72	65	11
64	41	9	40
51	70	13	17
25	38	31	31
46	49	25	23
42	75	52	54
86	53	101	65
26	38	25	27
50	82	22	18
38	59		15
33			24

## Sheet: E
Reg CT1	Reg CT13	LS CT1	LS CT13
0.7	35.6	10.1	9.9
3.9	31.8	16.3	3.1
15	32.8	1	6
4.1	20	8.7	10.2
6.3	28.6	3.4	29.2
	27.6	16.4	28.7
	25.7	22.2	5.1
25.7	18.1
	19
9.7
		2.9
		23	5.3
		12.2	14.3
4.4	16	33.4	30.8
1.6	11.8	16.3	21.9
14.5		12.4
3.4	10.5	3.6	14.8
0.6	12.2	40.9	12.2
	29.2	16.6	25.9
11	20.5	10.3
12.9	13.6
29.8	40.1
7.6		16.9	28.4
		9.4	10.5
4.6	30.5	5.2	3.1
8.2	19.8		7.9
8.8		11.6	17
5.4		11.3	13.7
0	23.9	10.9	24.7
17.8	13.1	20	7.8
19.9	29.3	16.2	3.8
		23.5
16.3	6.8	19.3	1.8
7.2	22.1	18.9	22.3
5.9	23.7	4.6	14.4
7.1	28.4	3.4	10.2
0.2	24.3		17.4
19.9	15.1		16.3
13.8	11.1	11.6	21.2
		5.3	17.2
		21.8
		29.1
2.6	6.4
19.6	0.9
0.2	26.7
9.7
6.1
10.1

## Sheet: F
REG 1	REG 12	LS 1	LS 13
59.375	29.4118	83.3333	86.3636
70	29.4118	68.5714	78.7879
66.6667	8.33333	59.0909	59.0909
46.1538	30
20.8333	16.6667
