# Supplementary material for: Energetic demands regulate sleep-wake rhythm circuit development
Source: eLife. 2024 Jul 22;13:RP97256. doi: 10.7554/eLife.97256 (PMC11262794; doi:10.7554/eLife.97256)
Supplement: Figure 2—figure supplement 1—source data 1. [file elife-97256-fig2-figsupp1-data1.xlsx]

## Sheet: A
iso x trp	npf x iso	npf x trp
17	43	18
12	16	19
16	26	17
44	14	10
16	4	4
14	22	13
18	15	15
5		9
16	9	16
9	36	18
13	12	12
17	7	17
16	22	18
9	17	34
22	19	15
3	15	9
18	5	13
1	6	0
17	7	17
39	5

## Sheet: B
TrpA1/+ CT1	TrpA1/+ CT13	npf/+ CT1	npf/+ CT13	npf>TrpA1 CT1	npf>TrpA1 CT13
4.2	15.9	14.7	27.9		11.7
16.7	47	33.4	6.2	5.4	36.6
31.2	19.3	1.5	21.8	29.9	39.8
10	16.3	31.1		19.9	14.6
5.1	13.8	10.9		31.7	12.9
	20.7	32.6	11.6	14.3	16
22.2	20.1		20.4		9.1
26	20.2	19.4	36.4	16.5	37.4
17	31	12.1			31.4
24.3		0.5		25.2
0	15.4	8.2	15.3		10.7
14.3	39	12.5	10.4	4	22.1
4.1	14.5	0.3	24.3	1.8	14.6
3.4	26.9	10.6	24.6	5.5	28
18.9	38.6	1.9	0	4	32.3
5.4	23	21.7	17.7	0.8	1
29.5	25.5	4.2	36.2	11.5	13.9
26.1	6.5	8.6	25.3	27.5	33.3
4.6	18.3		9.7	4.1	31.6
4.9		1.6		0.7
10	32	13.3	44.3	13.4	33.5
26.6	8	12.2	13	38.5	20.4
2.4	6.4	25.2	13.7	19	20.2
6.1	13.2	5	24.1		38.7
	1.7	0	11.5	21.4	44.7
6.6	18	31.9	31.5	29.7	15.2
26.3	8.1	8.4	32	32.4	25.6
23.2	21.4	12.6	31.7	22.1	28.2
15.6	31.3	8.5	35.5	20.5	24.9
14.9		0.4

## Sheet: C
TrpA1/+ CT1	TrpA1/+ CT13	npf/+ CT1	npf/+ CT13	npf>TrpA1 CT1	npf>TrpA1 CT13
12	34	47	56		32
28	34	59	25	17	49
39	46	6	50	40	35
31	35	54		36	34
10	30	61		59	42
	60	46	26	36	35
54	50		50		35
50	74	37	47	23	50
57	59	43			42
63		3		43
0	40	11	55		44
42	42	16	44	17	50
22	45	2	58	15	36
19	33	30	58	19	59
46	69	14	0	18	49
13	32	64	34	5	6
34	55	14	47	38	64
62	25	34	59	70	45
21	54		16	11	53
16		10		5
38	59	24	48	29	62
30	15	20	28	44	40
9	14	43	31	35	45
19	50	21	35		47
	8	0	42	56	55
26	30	30	40	51	44
54	19	16	34	32	48
28	67	29	37	58	52
34	36	29	45	36	43
54		2

## Sheet: D
TrpA1/+ CT1	TrpA1/+ CT13	npf/+ CT1	npf/+ CT13	npf>TrpA1 CT1	npf>TrpA1 CT13
21	28.06	18.77	29.89		21.94
35.79	82.94	33.97	14.88	19.06	44.82
48	25.17	15	26.16	44.85	68.23
19.35	27.94	34.56		33.17	25.76
30.6	27.6	10.72		32.24	18.43
	20.7	42.52	26.77	23.83	27.43
24.67	24.12		24.48		15.6
31.2	16.38	31.46	46.47	43.04	44.88
17.89	31.53	16.88			44.86
23.14		10		35.16
0	23.1	44.73	16.69		14.59
20.43	55.71	46.88	14.18	14.12	26.52
11.18	19.33	9	25.14	7.2	24.33
10.74	48.91	21.2	25.45	17.37	28.47
24.65	33.57	8.14		13.33	39.55
24.92	43.13	20.34	31.24	9.6	10
52.06	27.82	18	46.21	18.16	13.03
25.26	15.6	15.18	25.73	23.57	44.4
13.14	20.33		36.38	22.36	35.77
18.38		9.6		8.4
15.79	32.54	33.25	55.38	27.72	32.42
53.2	32	36.6	27.86	52.5	30.6
16	27.43	35.16	26.52	32.57	26.93
19.26	15.84	14.29	41.31		49.4
	12.75	0	16.43	22.93	48.76
15.23	36	63.8	47.25	34.94	20.73
29.22	25.58	31.5	56.47	60.75	32
49.71	19.16	26.07	51.41	22.86	32.54
27.53	52.17	17.59	47.33	34.17	34.74
16.56		12

## Sheet: E
TrpA1/+ CT1	TrpA1/+ CT13	npf/+ CT1	npf/+ CT13	npf>TrpA1 CT1	npf>TrpA1 CT13
68.5185	33.9286	63.6364	30.8642	77.193	44.9275
65.9091	18	62.5	14.0351	56.7901	35.8025
54.3478	11.3924	68.75	20.6897	89.0625	41.8182
64.8649	24.0506
69.2308
95

## Sheet: F
iso>TrpA1	iso>npf-Gal4	npf>TrpA1
-0.57083	-0.649616	-0.6951
-0.51923	-0.638889	-0.40357
-0.55857	-0.490431	-0.40385
-0.428571	-0.69697	-0.55599
-0.65873	-0.419231	-0.55481
-0.691877	-0.603865	-0.6
-0.635714	-0.416667	-0.40138
-0.632035	-0.65873	-0.56303

## Sheet: G
iso>TrpA1	iso>npf-Gal4	npf>TrpA1
0.6	0.8	0.363636
0.333333	0.8	0.481481
0.333333	0.8	0.5
0.818182	0.555556	0.826087
0.7	0.818182	0.333333
0.526316	0.733333	0.346154

## Sheet: H
iso>TrpA1	iso>npf-Gal4	npf>TrpA1
0.5	0.8	0.666667
0.6	0.842105	0.454545
0.727273	0.9	0.565217
0.608696	0.882353	0.68
0.5	0.913043	0.826087
0.52381	0.866667	0.583333

## Sheet: I
iso>TrpA1	iso>npf-Gal4	npf>TrpA1
-0.517241	-0.5	-0.857143
-0.75	-0.714286	-0.416667
-0.826087	-1	-0.454545
-0.363636	-0.333333	-0.391304
-0.52381	-0.6	-0.565217
-0.363636	-0.538462	-0.304348
