# Supplementary material for: Energetic demands regulate sleep-wake rhythm circuit development
Source: eLife. 2024 Jul 22;13:RP97256. doi: 10.7554/eLife.97256 (PMC11262794; doi:10.7554/eLife.97256)
Supplement: Figure 2—source data 1. [file elife-97256-fig2-data1.xlsx]

## Sheet: A
TrpA1/+ CT13	npf/+ CT13	npf>TrpA1 CT13
15	4	75
12	10	83
18	16	85
19	11	80
51	7	72
10	18	100
20	30	53
2	27	46
6	6	56
14	13	137
5	17	53
24	18	55
4	30	72
8	27	67
	13	70
	20	74
		52

## Sheet: B
TrpA1/+ CT1	TrpA1/+ CT13	npf>TrpA1 CT1	npf>TrpA1 CT13	npf/+ CT1	npf/+ CT13
0.2	29.8	11.1	11.6
4.7	21.6	14	24.5
	10.6	4.8	20.6
0.3	21.2	4.3	8.7
0.1	15.4	0	0
10.9	30.9	0.8	0.6
18.1	9.5	13.1	6.4
15.3	11.8	28	5.8
28.6	16.5	12.1	1.7
1.3		0
0		21.9
14.3	36.1	6.4	34.4
8.4	29.4			0.5	19
	24.5	6.4			30.6
0.5	22.2	0	0.3	7.9	29.4
14.5	15.5	15.7	13	0.1	6.4
4	27.2	4.7	28.4	0.6	0.5
7	38.6	34.8		10.6	6.9
16.7	12.8	10.2	6.4	27.2	1.7
		4.9		4.3	11.2
				7.9	0
1	20.8	13.9	6.6	0	6.3
10	16.3	9.9	11.7		24.6
2.7	9.2		15.2	20.4	30.5
3.3	13.5		16.6	11.4	25.1
6.9	14.9	0	1.3	3	17.5
21	24.8		6.1	2.5	1.1
18.6	10.8	11.8	26.8	7.4	10.5
20.5	12.5	21.7	7.1	24.1	35.3
15.1	33.8	17.9	0.2	30.1	21
0				8.8
0	0.2
5.9	11.3			1.6	13.8
9.7	27.1			17.4	18.5
	29.6			16	26.4
3.1	25.9			10.5	9.6
				1.1	0
13.2	9.2			1.8	0
12.1				12.1	11.4
10.7	5.2				15.1
23.3				8.2
				14.7
0	6.1
1.1	23.6
1.2	8.5
2.9	8.8
0.7	10.8
9.1	3.6
3.9	21			14.9	5.9
14.6	30.8			15.9	22.8
14.6	14.4			21.9	42.6
				5.6	25.2
				2.1	10.1
					0.1
				21.4	7.7
3.3	11.7			3.1	31.9
14.7	25.2				35
26.7	35.4
15.3	22.1
13.2	7.4
14.5	11.9
23.6	3.2
19.8
14.4
0.7	19.2
	13.3
0.8	9.1
3.8	5.2
1.8	7.6
2	6.2
10.5	37.5
	17.9
9	18.4
9.2

## Sheet: C
TrpA1/+ CT1	TrpA1/+ CT13	npf>TrpA1 CT1	npf>TrpA1 CT13	npf/+ CT1	npf/+ CT13
2	46	45	62
32	47	56	95
	41	29	65
1	52	30	60
1	48	0	0
38	54	8	6
31	28	52	49
29	51	60	40
56	53	70	16
7
				4	73
0		73			94
55	66	34	56	39	63
19	57			1	47
	43	46		6	5
4	49	0	3	41	37
47	69	47	61	47	14
11	49	33	50	23	78
24	52	82		37	0
42	21	39	51
		43
				0	50
					85
9	42	57	39	49	49
47	39	51	43	52	79
15	43	58	42	26	84
13	49		49	21	11
51	61	0	12	34	46
65	68		46	66	61
48	35	43	96	44	70
48	41	41	45	64
42	36	41	2
0
				13	59
				51	82
0	2			51	82
40	18			41	66
43	62			10	0
	46			14	0
25	84			25	46
					50
30	45			27
23				59
27	28
56
0	21
8	67
3	37
16	42			50	42
7	59			51	57
26	17			65	64
7	56			35	49
41	55			11	50
29	42				1
				51	51
				9	109
					74
29	37
29	58
58	46
43	58
52	34
56	54
32	11
32
48
6	64
	34
4	19
23	20
15	43
11	31
36	56
	38
26	60
44

## Sheet: D
TrpA1/+ CT1	TrpA1/+ CT13	npf>TrpA1 CT1	npf>TrpA1 CT13	npf/+ CT1	npf/+ CT13
6	38.87	14.8	11.23	7.5	15.62
8.81	27.57	15	15.47		19.53
	15.51	9.93	19.02	12.15	28
18	24.46	8.6	8.7	6	8.17
6	19.25	0	0	6	6
17.21	34.33	6	6	15.51	11.19
35.03	20.36	15.12	7.84	34.72	7.29
31.66	13.88	28	8.7	11.22	8.62
30.64	18.68	10.37	6.38	12.81	0
11.14		0
				0	7.56
					17.36
				24.98	37.35
0		18		13.15	19.06
15.6	32.82	11.29	36.86	6.92	12.5
26.53	30.95			7.14	6
	34.19	8.35		13.06	13.7
7.5	27.18	0	6	21.91	34.72
18.51	13.48	20.04	12.79	41.05	18
21.82	33.31	8.55	34.08	8.25
17.5	44.54	25.46
23.86	36.57	15.69	7.53
		6.84
				7.38	14.03
				20.47	13.54
6.67	29.71	14.63	10.15	18.82	19.32
12.77	25.08	11.65	16.33	15.37	8.73
10.8	12.84	24.93	21.71	6.6
15.23	16.53		20.33	7.71
8.12	14.66	0	6.5	29.04	14.87
19.38	21.88		7.96		18.12
23.25	18.51	16.47	16.75	18.22
25.63	18.29	31.76	9.47	14.95
21.57	56.33	26.2	6
0
0	6
8.85	37.67			17.88	8.43
13.53	26.23			18.71	24
	38.61			20.22	39.94
7.44	18.5			9.6	30.86
				11.45	12.12
26.4	12.27				6
31.57				25.18	9.06
23.78	11.14			20.67	17.56
24.96					28.38
0	17.43
8.25	21.13
24	13.78
10.88	12.57
6	10.98
21	12.71
33.43	22.5
21.37	33.6
30.21	20.57
6.83	18.97
30.41	26.07
27.62	46.17
21.35	22.86
15.23	13.06
15.54	13.22
44.25	17.45
37.13
18
7	18
	23.47
12	28.74
9.91	15.6
7.2	10.6
10.91	12
17.5	40.18
	28.26
20.77	18.4
12.55

## Sheet: E
TrpA1/+ CT1	TrpA1/+ CT13	npf/+ CT1	npf/+ CT13	npf>TrpA1 CT1	npf>TrpA1 CT13
73.8095	36.3636	78.7879	40.9091	92.5926	77.193
74.2857	16.9643	70	12.5	65.9091	76.6667
65.5172	33.7209	89.5833	33.9623	75.5556	86.6667
75	23.0769
72.2222
76.4706

## Sheet: F
iso>TrpA1	iso>npf-Gal4	npf>TrpA1
-0.32366	-0.571429	-0.0044643
-0.48746	-0.548007	-0.175641
-0.36884	-0.499275	-0.0260943
-0.61997	-0.4275	0.179654
-0.65952	-0.4625	-0.0238095
-0.47215	-0.4425	0.234594
-0.555882	-0.541667	0.0058528
-0.641604	-0.482143	-0.139286

## Sheet: G
TrpA1/+ Ct13	npf-G4/+ CT13	TrpA1>npf Ct13
-0.4	-0.694139	-0.4375
-0.6	-0.506897	-0.52979
-0.49583	-0.654509	-0.45255
-0.42361	-0.447917	-0.63889
-0.53202	-0.572917	-0.486667
-0.44684	-0.568966	-0.68
-0.55833	-0.653846	-0.695
-0.80729	-0.561195	-0.646552

## Sheet: H
Reg LTM	L.S. LTM
-0.399845	-0.131119
-0.266667	-0.166667
-0.5275	0.133776
-0.514706	0.165152
-0.391304	0.0271991
-0.386364	0.0878233
-0.624074	0.132754
-0.455767	-0.0344828

## Sheet: I
Reg STM	L.S. STM
-0.45	-0.733083
-0.541667	-0.564182
-0.333333	-0.537879
-0.313187	-0.581197
-0.351191	-0.606811
-0.541209	-0.575758
-0.417391	-0.358696
-0.363095	-0.361111
