# Supplementary material for: Energetic demands regulate sleep-wake rhythm circuit development
Source: eLife. 2024 Jul 22;13:RP97256. doi: 10.7554/eLife.97256 (PMC11262794; doi:10.7554/eLife.97256)
Supplement: Figure 3—figure supplement 1—source data 1. [file elife-97256-fig3-figsupp1-data1.xlsx]

## Sheet: A
Dh44>mCherry	Dh44>mCherry Gaboxadol 25 mg/ml
303	234
300	320
	360
336	278
393	355
229	380
330	302
378	433
341	405
404	382
327	360
455	388
507
342	353
483
500	273
411	480
460	448
406	411
432	249
192	310
374	347
	172
	211
227	389
228	494
288	441
300	387
464	355
485	483

## Sheet: B
Dh44>mCherry	Dh44>mCherry Gaboxadol 25 mg/ml
17.45	28.72
13.9	30.36
	13.28
14.39	20.44
12.17	12.79
34.06	19.86
13.47	29.4
31.43	19.75
18.11	18.21
21.21	22.35
32.2	24.15
11.21	23.55
12.59
11.72	11.8
11.66
13.44	33.49
15.46	15.93
12.44	15.05
24.75	14.29
14.82	20.75
16.41	23.23
19.14	26.35
	27.17
	22.04
16.12	20.71
20.84	20.74
22.21	18.73
23.2	15.44
13.25	26.79
16	15.86

## Sheet: C
Trp>iso 30C	iso>R76G11 30C	Trp>R76G11 30C
	86	123
	98	89
105	134
57	105	85
84		112
166		125
26		74
69	61	120
	94	67
109	79	64
11	75	93
90	111	89
	105	115
67		61
98	101	66
128	78	122
95	74	83
3	74	111
52	116	98
39	85
13	72	68
59	27	55
40	40	57
82	96	81
61	31	51
86		75
	67
100	28	67
51	63	83
	70	90
27	98	127
49	105	72
	95	86
109	39	145
158	96	99
109	94	85
91	83	104
134	88
125	90	102
153	71	59

## Sheet: D
Trp>iso 30C	iso>R76G11 30C	Trp>R76G11 30C
	11.93	24.88
	15.92	37.48
10.51	18.54
9.89	15.09	35.58
8.29		31.07
12.07		15.36
9.69		43.38
9.39	12.79	22.85
	17.87	55.97
26.97	9.34	48.47
6	15.6	20.9
7.47	11.89	39.78
	21.03	26.92
10.3		33.93
10.84	16.1	25.91
11.86	21.85	19.38
10.11	21.65	27.25
6	23.11	22.49
7.85	15.31	23.88
8.15	22.02
7.38	13.17	12.88
10.17	10.89	36.87
12.15	14.4	32.11
11.27	9.75	36
13.18	8.71	21.41
9.98		29.04
	14.06
13.14	11.79	17.82
12.59	10.19	17.2
	19.54	26.87
6.22	17.76	15.5
8.45	21.03	23.67
	12.57	34.95
9.85	11.08	15.48
13.75	29.38	40.97
10.51	11.17	47.15
9.1	27.4	35.83
9.27	34.91
10.37	18.53	31.12
13.65	11.07	24.92

## Sheet: E
iso>TrpA1	iso>R76G11	R76G11>TrpA1
	37.3	18.3
51.1	51.4	54.1
38.5	17.6	70.8
36.2	39.5	53.9
56.2	46.7	40
43.4	35.2	24.4
39	47.4	56.6
39.1	58.4	28.7
54	8.6	45.7
39.7	34.1	48.9
31	32.6	34.4
36.1	35.7	36
43.9	40.2	29.4
31.4	48	34.2
45.9	73.7	24.8
49.2	24.6	39
30	27.4	47.6
43.3	42.5	64.8
	31.4	52.4
28.2	41.7	34.9
36.5		45.5
48.2	63	41.6
63.1	59.9	35.5
50.2	34.3
54.6	36.2	33.3
36.2	52.9	61.1
23	55.5	44.8
	55.6	60.7
38	64.1	27.7
48.3	66	72.7

## Sheet: F
iso>TrpA1	iso>R76G11	R76G11>TrpA1
	87	72
112	93	76
73	55	91
95	88	60
119	127	119
80	72	38
92	76	90
85	75	110
103	37	108
68	66	98
116	96	88
127	77	101
111	140	63
122	116	101
141	74	82
174	78	83
112	92	107
114	137	115
	95	94
86	116	78
72		61
119	102	115
152	85	104
100	83
124	87	73
86	136	102
51	82	104
	99	111
117	97	53
106	92	83

## Sheet: G
iso>TrpA1	iso>R76G11	R76G11>TrpA1
	25.72	15.25
27.38	33.16	42.71
31.64	19.2	46.68
22.86	26.93	53.9
28.34	22.06	20.17
32.55	29.33	38.53
25.43	37.42	37.73
27.6	46.72	15.65
31.46	13.95	25.39
35.03	31	29.94
16.03	20.38	23.45
17.06	27.82	21.39
23.73	17.23	28
15.44	24.83	20.32
19.53	59.76	18.15
16.97	18.92	28.19
16.07	17.87	26.69
22.79	18.61	33.81
	19.83	33.45
19.67	21.57	26.85
30.42		44.75
24.3	37.06	21.7
24.91	42.28	20.48
30.12	24.8
26.42	24.97	27.37
25.26	23.34	35.94
27.06	40.61	25.85
	33.7	32.81
19.49	39.65	31.36
27.34	43.04	52.55

## Sheet: H
iso>TrpA1	iso>R76G11-G4	R76G11>TrpA1
47.9452	51.7241	58.3333
50.6329	52.9412	56.5217
70.8333	60	60
57.3529

## Sheet: I
iso>TrpA1	iso>R76G11-Gal4	R76G11>TrpA1
0.458333	0.451613	0.387097
0.722222	0.304348	0.36
0.352941	0.333333	0.217391
0.636364	0.391304	0.652174
0.733333	0.416667	0.6
0.45	0.809524	0.615385

## Sheet: J
iso>TrpA1	iso>R76G11-Gal4	R76G11>TrpA1
0.48	0.607143	0.5
0.478261	0.6	0.538462
0.647059	0.571429	0.538462
0.333333	0.461538	0.32
0.666667	0.333333	0.65
0.352941	0.571429	0.333333

[truncated: 2 more sheets: K, L]
