# Supplementary material for: Energetic demands regulate sleep-wake rhythm circuit development
Source: eLife. 2024 Jul 22;13:RP97256. doi: 10.7554/eLife.97256 (PMC11262794; doi:10.7554/eLife.97256)
Supplement: Figure 3—source data 1. [file elife-97256-fig3-data1.xlsx]

## Sheet: A
Dh44>mCherry	Dh44>mCherry Gaboxadol 25 mg/ml
88.1	112
69.5	161.9
	79.7
80.6	94.7
79.7	75.7
130	125.8
74.1	148
198	142.5
102.9	122.9
142.8	142.3
175.5	144.9
85	152.3
106.4
66.8	69.4
93.9
112	152.4
105.9	127.4
95.4	112.4
167.5	97.9
106.7	86.1
52.5	120
119.3	152.4
	77.9
	77.5
61	134.3
79.2	170.8
106.6	137.7
116	99.6
102.5	158.5
129.3	127.7

## Sheet: B
Dh44>mCherry	Dh44>mCherry Gaboxadol 25 mg/ml
50	37.3333
38.2353	30.1205
45.2381	30.303

## Sheet: C
ctrl t5 hrs	25 mg Gab t5 hrs
2.5	1.8
2.8	1.8
4	1.8
2	1.9
3.2	1.4
	2
	1.6

## Sheet: D
ctrl t5 hrs	25 mg Gab t5 hrs
3.4	3.5
3.4	4.1
3.3	3.1
3.5	3.5
4.9	3.7
4.4	3.7
3.6	3.6
3.5	3.9

## Sheet: E
L2 Dh44>mCherry	L2 Dh44>mCherry Gab
0.313204	0.0619048
-0.430921	-0.0299145
0.181818	0.126894
-0.0940171	0.52
-0.24	0.204741
0.0527065	-0.16005
-0.061828	-0.49
0.185185	-0.255411

## Sheet: F
Trp>iso 30C	iso>R76G11 30C	Trp>R76G11 30C
	17.1	51
	26	55.6
18.4	41.4
9.4	26.4	50.4
11.6		58
33.4		32
4.2		53.5
10.8	13	45.7
	28	62.5
49	12.3	51.7
1.1	19.5	32.4
11.2	22	59
	36.8	51.6
11.5		34.5
17.7	27.1	28.5
25.3	28.4	39.4
16	26.7	37.7
0.3	28.5	41.6
6.8	29.6	39
5.3	31.2
1.6	15.8	14.6
10	4.9	33.8
8.1	9.6	30.5
15.4	15.6	48.6
13.4	4.5	18.2
14.3		36.3
	15.7
21.9	5.5	19.9
10.7	10.7	23.8
	22.8	40.3
2.8	29	32.8
6.9	36.8	28.4
	19.9	50.1
17.9	7.2	37.4
36.2	47	67.6
19.1	17.5	66.8
13.8	37.9	62.1
20.7	51.2
21.6	27.8	52.9
34.8	13.1	24.5

## Sheet: G
iso>TrpA1	iso>R76G11-G4	R76G11>TrpA1
59.0476	59.8039	18.3486
45.082	55.5556	25.3333
65.2778	56.5217	16.5517
55.2381

## Sheet: H
iso>TrpA1	iso>R76G11-Gal4	R76G11>TrpA1
0.166667	0.0226449	0.043956
0.060185	-0.0800248	-0.0038095
-0.12435	0.0849298	0.112782
-0.04102	-0.0416667	-0.0147783
-0.02917	-0.00392	-0.0925926
0.044118	-0.07251	-0.166667
-0.15	-0.13665	0.122074
0.098958	-0.16399	-0.108333

## Sheet: I
iso>TrpA1	iso>R76G11-G4	R76G11>TrpA1
2.2	2.4	1.1
2.1	1.5	1.6
3.6	1.5	1.3
4.2	4	0.8
2.8	4.6	1.3
		1

## Sheet: J
iso>TrpA1	iso>R76G11-G4	R76G11>TrpA1
50.329	47.297	55.326
56.036	51.01	40.262
48.836	60.415	41.195
55.218	58.009	40.804
59.464	44.283	49.244
60.033	63.695	46.228
48.549	51.078	38.897
50.774	57.689	43.566
51.856	53.16	36.401
41.725	54.378	49.396
47.518	50.567	42.942
71.007	65.795	40.719
42.048	47.76	35.384
47.802	59.54	38.833
55.714	61.033	40.497
54.332	63.348	33.242
57.306	51.478	29.275
60.539	61.221	36.401
40.497	63.53	38.91
49.98	57.723	43.186
48.765	57.306	33.377
54.452	62.801	32.45
56.648	68	42.202
66.098	55.714	46.228
55.946	58.822	39.812
45.277	53.54	41.725
55.471	51.539	43.681
58.421	61.745	41.869
59	59.059	48.466
58.241	61.033	36.715
57.385	53.388	38.639
60.729	58.412
