# Supplementary material for: Energetic demands regulate sleep-wake rhythm circuit development
Source: eLife. 2024 Jul 22;13:RP97256. doi: 10.7554/eLife.97256 (PMC11262794; doi:10.7554/eLife.97256)
Supplement: Figure 4—source data 1. [file elife-97256-fig4-data1.xlsx]

## Sheet: A
Time	cry-G4 Dh44-LexA																	Dh44-LexA
0	-0.033102	0.0676946	0.107153	-0.142567	0.122678	0.344224	-0.035473	0.00883521	0.660741	0.0359043	0.0699207	0.0774111	-0.0330765	0.0249305	-0.0196283	0.0640817		0.13391	0.139054	0.116067	0.177419	0.227813	0.196162	-0.0318894	0.0695182	-0.0115205	0.0386109	0.140834	-0.0097818	0.236082	0.155654
5	-0.147264	-0.0676723	0.060677	-0.029189	0.133244	0.209702	0.0598576	0.0184053	0.269513	0.0316803	0.0948036	0.16199	-0.0250752	0.00573267	-0.0766754	0.139187		0.109413	0.031608	0.0817555	0.166496	0.234004	0.263523	-0.0329916	0.046533	-0.107914	-0.015071	-0.0522117	0.0702761	0.0478966	0.0413714
10	-0.110061	-0.109716	-0.129264	-0.0077591	0.0972077	0.143715	0.0495907	0.00214397	0.210638	-0.0844807	0.106495	0.0640741	-0.0258106	-0.0435858	0.0526778	0.184039		0.0259434	-0.0040887	-0.0659635	0.133146	0.224995	0.209901	-0.011082	-0.0030033	-0.0944019	-0.034058	0.0428554	0.0868858	0.0389214	0.00683582
15	-0.081346	-0.10846	-0.244212	-0.0119792	0.177087	0.0957353	0.0482394	0.0464929	0.340742	-0.0548719	0.127687	0.0428241	-0.0980872	0.0295644	-0.0004797	-0.0077139		0.0769867	-0.0175316	-0.0024939	0.143488	0.185189	0.28063	-0.0138122	-0.0045812	0.0374274	-0.0155141	0.0081188	0.0909635	-0.0239044	-0.0202074
20	0.0313431	0.0222901	-0.0414829	0.0321985	0.180899	0.0596619	0.0821933	0.0324491	0.301468	-0.0015434	0.00639858	0.112692	0.135451	0.087406	0.0405104	0.040001		0.0651954	0.0347717	0.0607647	0.138596	0.0869223	0.088117	0.00363747	-0.0239582	0.033449	-0.003639	0.0766894	0.0614412	-0.0438134	-0.0358995
25	-0.0031351	0.0262855	-0.0488212	0.108474	0.0666178	-0.0459186	-0.0124087	0.0125569	0.243529	-0.0038991	-0.0099605	0.16786	0.0484075	0.0896127	-0.0225348	-0.0522613		0.0185028	-0.0097574	0.0325711	-0.0527039	0.0107421	-0.142478	0.0404192	-0.0073794	-0.0871225	0.0102301	-0.0271128	0.00337539	-0.0248984	-0.0132617
30	0.0909871	-0.0178225	-0.0143768	-0.0834542	-0.0954817	-0.115856	0.0374027	0.0132182	0.160263	0.0104382	0.0376433	0.00250352	0.013137	0.14671	0.113116	-0.0323226		-0.120361	-0.0434241	-0.0044227	-0.0602987	-0.0929019	-0.163454	0.0716726	-0.0189824	-0.0699279	-0.0197679	-0.105671	0.0548082	-0.0438134	-0.0206254
35	0.142791	0.0215889	0.0425996	-0.0821677	-0.0580294	-0.109922	-0.023921	0.0227494	0.152962	0.00357418	-0.0532266	-0.110929	-0.0644052	0.0535617	-0.0024316	-0.1683		-0.0004138	-0.0391699	-0.0167338	-0.0832842	-0.124275	-0.121336	0.0381299	-0.0027719	0.103595	-0.018926	0.101817	-0.0373468	-0.0248984	-0.0132617
40	0.0879139	-0.0734801	-0.102218	-0.0139872	-0.0409281	-0.140979	-0.0998702	-0.0684254	0.00346463	0.0478453	-0.0721056	-0.136303	-0.0907036	-0.101179	0.00051766	-0.0204446		-0.0867367	-0.0073819	-0.0337766	-0.0513189	-0.115306	-0.157585	-0.0436242	0.00522293	0.0415043	0.0975436	0.025094	-0.0191605	-0.012035	-0.0206254
45	-0.0064519	-0.142328	-0.0382612	0.0745721	0.00276922	-0.222017	-0.0572125	-0.07736	0.0396878	0.0152715	-0.0293214	-0.100416	0.332307	-0.105786	-0.0280914	-0.0527689		-0.0110859	0.0204865	-0.091731	-0.196223	-0.216132	-0.0819534	0.0150162	-0.0092519	0.00573564	0.0145282	-0.0400408	-0.0396031	-0.0395451	-0.0237767
50	-0.0469954	0.026431	0.113139	0.110545	-0.0640566	-0.270315	-0.0291803	-0.0353841	0.187089	0.00158401	-0.0915905	-0.133157	0.0134605	-0.0938421	-0.0564582	-0.0461903		-0.0706891	-0.0634428	-0.0038953	-0.13542	-0.214941	-0.191065	-0.0001781	-0.0192244	0.0861659	-0.0030186	-0.093587	-0.118546	-0.0382588	-0.0459321
55	0.0753194	0.140551	0.15172	0.0453138	-0.220401	0.114661	-0.019218	0.0243184	0.256315	-0.0015028	-0.186743	-0.14855	-0.205605	-0.0931249	-0.0005224	-0.0473071		-0.140665	-0.0411242	-0.0721416	-0.179895	-0.206111	-0.180461	-0.0352979	-0.0321213	0.0630099	-0.0509181	-0.0767865	-0.143312	-0.0717328	-0.0102712
60	0.112001	0.214638	0.143348	-0.0594984	-0.301605	-0.0626917	0.0047736	0.106688	0.278873	0.0426059	-0.242168	-0.158147	-0.0976754	-0.0988898	0.0500848	-0.0300282		-0.223993	-0.151724	-0.0423658	-0.149895	-0.135864	-0.0808529	-0.055427	0.112553	0.0281773	-0.0956714	-0.0878509	-0.0877466	-0.0684584	-0.018278
65	0.145343	0.21432	0.25211	0.205458	0.428033	-0.0997947	-0.108852	0.473799	0.335632	0.0700621	-0.174019	0.297168	0.0750589	-0.0987243	-0.005965	0.207673		-0.115774	-0.177897	-0.129825	-0.176767	-0.189382	-0.203304	0.0387065	0.130731	-0.0118038	-0.117184	0.097246	-0.0459914	-0.0531393	-0.042202
70	0.0197112	0.0674433	0.120776	0.289389	0.403779	0.701644	0.367072	0.435662	0.259853	0.103448	0.244197	0.261504	0.102652	-0.042648	-0.0009071	0.217784		-0.204099	-0.203897	-0.106528	-0.167408	-0.107884	-0.166755	0.0140157	0.0840246	0.0521093	-0.0832202	0.0824837	-0.0371837	-0.0898584	-0.0616564
75	0.0468949	0.0699834	-0.0007144	0.346619	0.368523	0.875309	0.371126	0.352112	1.00193	0.124122	0.192999	0.356695	0.142188	0.145524	0.0697036	0.289418		-0.0749453	-0.238708	-0.0216161	-0.211592	-0.238813	-0.125838	0.0452861	0.104517	0.094443	-0.0545515	-0.0493	-0.0111411	-0.0638101	-0.0548393
80	0.0181688	0.0625747	-0.0341247	0.327496	0.277371	0.869675	0.465543	0.496531	1.03186	0.0721742	0.20206	0.481434	0.11183	0.11863	0.0958193	0.439669		-0.111691	-0.115455	-0.121025	-0.253698	-0.136102	-0.15455	0.0339243	0.10095	-0.0030095	-0.0236008	-0.0353529	-0.034139	-0.0527593	-0.0471219
85	-0.0964687	0.0322786	0.131773	0.31904	0.285195	0.900431	0.480181	0.445154	1.03656	0.114252	0.0575413	0.422712	0.113359	0.23652	0.11729	0.390979		-0.15337	-0.188845	-0.0914296	-0.253721	-0.182556	-0.194533	-0.0169494	0.095859	-0.0270277	-0.0957822	-0.119792	-0.10316	-0.0568522	-0.0757407
90	0.0373156	0.149574	0.193642	0.326272	0.411404	0.919994	0.551759	0.327862	1.24364	0.121766	0.118585	0.482165	0.0356112	0.170734	0.0801898	0.232789		-0.218349	-0.251234	-0.0349821	-0.151459	-0.209782	-0.067414	-0.0156437	0.10014	-0.0591998	-0.0782353	-0.108932	-0.149673	-0.0791292	-0.144265
95	0.0371417	0.118775	0.119046	0.314678	0.458823	0.988996	0.521488	0.535628	1.29791	0.10223	0.205902	0.244997	-0.0352533	0.270254	0.196749	0.357944		-0.25355	-0.240274	-0.0732718	-0.167654	-0.17946	-0.0540418	0.0165933	0.0288813	-0.0732782	-0.0966684	-0.0262393	-0.190504	-0.0744516	-0.0488262
100	-0.0848832	0.0472414	0.119046	0.337505	0.430411	0.958969	0.587038	0.605212	1.23733	0.120913	0.0202514	0.252823	0.141158	0.169824	0.193415	0.427222		-0.29586	-0.125496	-0.0810623	-0.156083	-0.21629	-0.031099	0.0131509	0.108724	-0.132006	-0.0127891	-0.0135734	-0.161172	-0.0755041	-0.017667
105	-0.0880492	0.122744	0.0489436	0.394782	0.485092	1.00577	0.387832	0.463231	1.24233	-0.0125503	0.0404386	0.324337	-0.0096021	0.169659	0.196692	0.432867		-0.423453	-0.133994	-0.10475	-0.189969	-0.282846	-0.0937582	0.00033068	0.119791	-0.0619711	-0.0677117	-0.152753	-0.106939	-0.106785	-0.0488262
110	-0.030829	0.0514353	0.053637	0.389605	0.461981	0.911345	0.389368	0.453959	1.02857	0.05211	0.0636828	0.164851	-0.0944395	0.0271095	0.274597	0.419791		-0.536085	-0.117841	-0.0584743	-0.324531	-0.28116	-0.180694	-0.0153045	0.0825834	-0.0468951	-0.181301	-0.128993	-0.0773894	-0.124882	-0.017667
115	-0.0175967	0.184064	0.0461992	0.428072	0.21679	0.869974	0.302569	0.322312	0.897043	0.0720117	0.0696866	0.260736	0.0663516	0.181657	0.200681	0.421314		-0.533879	-0.130614	0.0956941	-0.150342	-0.198094	-0.210807	-0.0153045	0.0630066	-0.0309076	-0.0606442	-0.0839201	-0.227529	-0.125525	-0.0035184
120	-0.0007229	0.0671787	-0.0230874	0.321299	0.21345	1.01796	0.425111	0.232681	1.14825	0.0918322	0.195588	0.213914	0.141482	0.19076	0.0839084	0.310209		-0.675044	-0.153635	-0.100802	0.0294094	-0.167772	-0.323854	-0.0015008	0.0982154	-0.0664053	-0.0963804	-0.148531	-0.0884806	-0.103277	-0.0097245
125	-0.013932	0.0861634	0.0831892	0.392805	0.560704	1.09935	0.569286	0.293511	1.05122	0.114943	0.274918	0.326443	0.229496	0.107431	0.102558	0.353274		-0.683415	-0.172973	-0.134255	-0.011893	0.0528902	-0.294475	-0.0139479	-0.0100198	-0.055049	-0.119023	-0.237833	-0.0842399	-0.0976641	0.0259365
130	0.135288	0.156202	0.268417	0.280808	0.547688	1.07943	0.501961	0.298504	1.30546	0.137119	0.305681	0.346702	0.059674	0.0762625	0.0688915	0.343264		-0.734095	-0.163396	-0.18145	0.00202342	0.19519	-0.280836	-0.0464053	0.0156688	-0.133484	-0.117273	-0.196224	-0.14622	-0.132103	-0.0268958
135	0.131125	0.232617	0.325394	0.282063	0.459531	1.11358	0.609532	0.293187	1.31205	0.0854555	0.271035	0.243882	-0.102823	-0.0349247	0.00623091	0.32962		-0.762407	-0.080071	-0.0783801	-0.0063085	0.227912	-0.0479393	-0.0788628	0.076177	0.00553856	-0.254258	-0.129634	-0.156061	-0.108013	-0.0050297
140	0.187348	0.28928	0.0832687	0.163837	0.521237	1.10704	0.561642	0.324167	1.09851	0.094919	0.25659	0.289812	0.200227	-0.0721894	-0.0349302	0.3069		-0.781702	-0.0618231	-0.0852665	0.0164312	0.219697	0.226074	-0.110896	0.109976	0.0334367	-0.152522	-0.157266	-0.255882	-0.0618221	-0.0156734
145	0.0630612	0.193113	0.0492419	0.179149	0.461401	1.10251	0.620978	0.336356	1.23672	0.199058	0.344637	0.42187	0.149012	-0.107689	-0.0900681	0.323488		-0.815437	-0.133432	-0.15624	-0.0424509	0.170425	0.108492	-0.113949	0.0561584	0.0568514	-0.0513833	-0.245432	-0.224647	-0.0765565	0.0409212
150	0.114784	0.23816	0.0088115	0.179149	0.547651	1.15749	0.606989	0.323116	1.29035	0.144592	0.23924	0.373586	0.0450246	-0.111302	-0.129092	0.251388		-0.815594	-0.0748018	-0.10246	-0.146612	0.0722974	0.0123523	-0.122614	-0.0077687	0.0694517	-0.109806	-0.149375	-0.252212	-0.0413869	0.0324641
155	0.0859888	0.337476	0.0530602	0.149734	0.540081	1.23413	0.547374	0.256009	1.19093	0.210186	0.224327	0.268055	0.00075257	-0.0829744	-0.174826	0.158415		-0.815594	-0.126295	-0.094579	-0.0797325	-0.0338865	0.0999219	-0.108912	-0.0245999	-0.0327182	-0.0089341	-0.189062	-0.219482	-0.0825789	0.00599977
160	0.114784	0.179658	0.0442105	0.179792	0.430829	1.07249	0.55107	0.249227	1.17303	0.153934	0.199719	0.373809	-0.112913	-0.0641352	-0.145534	0.16946		-0.830397	-0.0790344	-0.0713731	-0.0948327	0.0153062	0.154945	-0.129431	-0.0714643	-0.0533615	-0.131962	-0.221964	-0.237995	-0.0565306	0.0292485
165	0.161996	0.336682	0.186741	0.204924	0.550048	0.986843	0.653011	0.281944	1.25139	0.157914	0.225552	0.409981	0.0142254	0.0583887	-0.13509	0.114395		-0.840013	-0.0844116	-0.0156338	-0.102562	0.0189574	0.0762455	-0.12565	-0.108356	-0.0256851	-0.0853028	-0.278276	-0.209777	-0.0635177	0.00616055
170	0.287976	0.453898	0.269233	0.221899	0.493025	1.05944	0.613771	0.419945	1.45937	0.147476	0.217125	0.474524	-0.031488	0.0263924	-0.170054	0.0417471		-0.867253	-0.123283	-0.0519646	-0.0166509	0.0633479	0.204332	-0.138249	-0.170127	-0.0739556	-0.110826	-0.233349	-0.240686	-0.0688677	-0.0325874
175	0.28982	0.443565	0.288324	0.172733	0.519676	1.12354	0.535504	0.425612	1.37549	0.170586	0.141237	0.489322	0.292359	0.0300609	-0.223781	0.0745181		-0.866149	-0.0965156	-0.0885214	-0.130126	0.173382	0.255486	-0.0953459	-0.140714	-0.0958799	-0.0883159	-0.320991	-0.117187	-0.0495727	-0.020336
180	0.310486	0.596369	0.390862	0.221491	0.44744	1.14042	0.566345	0.368192	1.33556	0.206003	0.285824	0.52038	0.185636	-0.0262636	-0.257149	0.0757566		-0.846633	-0.129513	-0.114967	-0.156686	0.108433	0.205532	-0.10508	-0.140767	-0.188282	-0.194794	-0.262902	-0.146438	-0.0160695	-0.0636822
185	0.360179	0.586566	0.429861	0.190993	0.450454	1.16541	0.649408	0.336421	1.30566	0.19528	0.260818	0.638778	0.334337	-0.065735	-0.125972	0.10404		-0.861578	-0.170446	-0.122426	-0.0430093	0.081624	0.198029	-0.151561	-0.106957	-0.0425964	-0.112532	-0.25507	-0.10944	-0.0254539	0.189225
190	0.344512	0.499223	0.363836	0.191919	0.374478	1.14688	0.502411	0.404423	1.30795	0.150197	0.244321	0.643546	0.192461	-0.196754	-0.17742	0.10601		-0.878082	-0.112982	-0.191712	-0.0635153	0.0451313	0.19933	-0.123225	-0.0553484	-0.159608	-0.165637	-0.223798	-0.144426	-0.0612667	-0.190827
195	0.381425	0.676012	0.398081	0.145153	0.257601	0.889705	0.357229	0.380381	1.23814	0.182162	0.29041	0.556144	0.473566	-0.17626	-0.114275	0.0897056		-0.896747	-0.158915	-0.174293	-0.0371122	0.1863	0.15211	-0.0709265	-0.0399689	-0.181927	-0.116054	-0.273705	-0.389847	-0.11272	0.0391847
200	0.29955	0.640702	0.428051	0.0774744	0.288808	1.22917	0.380267	0.396772	1.03121	0.170383	0.310955	0.399332	0.41082	-0.218848	-0.220533	0.00121994		-0.906709	-0.132612	-0.0799171	-0.194615	0.024216	0.0583047	-0.0630071	-0.051635	-0.245828	-0.130832	-0.25772	-0.21641	-0.0642486	0.0599575
205	0.3596	0.597957	0.344883	0.192515	0.415361	1.09755	0.406299	0.350309	1.01408	0.233459	0.319011	0.448878	0.633768	-0.198878	-0.224436	0.0216866		-0.920172	-0.0673191	-0.138745	-0.18128	-0.110146	-0.119235	-0.128583	-0.0063801	-0.232328	-0.110183	-0.326523	-0.191917	-0.0249276	0.0277694
210	0.329853	0.584714	0.327522	0.222887	0.343343	0.902285	0.395131	0.318941	1.11408	0.251452	0.456479	0.439702	0.560668	-0.184149	-0.271966	-0.0373377		-0.899963	-0.12771	-0.186061	-0.304047	-0.224764	-0.125972	-0.0872739	0.0168891	-0.19401	-0.0988839	-0.304453	-0.20116	-0.0073282	0.124077
215	0.345822	0.571378	0.268716	0.20105	0.261595	1.05085	0.445327	0.322001	1.18189	0.16953	0.415595	0.528306	0.519044	-0.142333	-0.295489	-0.0584541		-0.911328	-0.119406	-0.200723	-0.39514	-0.323665	-0.201103	-0.107488	-0.0192139	-0.147698	-0.0854358	-0.308529	-0.200725	0.0884746	0.0762927
220	0.203421	0.720425	0.335914	0.186962	0.146569	0.992047	0.305179	0.29071	1.31841	0.141505	0.235728	0.641614	0.435236	-0.151601	-0.308041	-0.115083		-0.929756	-0.135678	-0.167873	-0.346958	-0.266197	-0.242953	-0.0800668	-0.0151428	-0.146318	-0.238616	-0.315633	-0.244002	0.089644	0.106391
225	0.241158	0.738576	0.395893	0.169171	0.175525	0.873737	0.321394	0.376426	1.29842	0.180943	0.34841	0.609046	0.276357	-0.21016	-0.347364	-0.130006		-0.929583	-0.157047	-0.148616	-0.321918	-0.266694	-0.235784	-0.048966	-0.0907044	-0.203494	-0.162248	-0.339306	-0.242725	0.0208835	0.124012
230	0.209776	0.806352	0.149373	0.137152	0.163543	0.975742	0.313777	0.381924	1.29585	0.089842	0.337256	0.539104	0.349663	-0.20445	-0.380717	-0.14627		-0.936929	-0.0920239	-0.12886	-0.436688	-0.283303	-0.29971	-0.0398426	-0.11957	-0.230246	-0.172816	-0.330046	-0.258492	-0.0022121	0.140508
235	0.209255	0.766292	0.277824	0.0689401	0.0492986	0.929691	0.382056	0.392921	0.963742	0.0906137	0.383056	0.614717	0.269208	-0.316023	-0.386559	-0.245313		-0.921196	-0.10605	-0.163157	-0.368514	-0.399409	-0.353232	0.0351114	-0.138715	-0.254942	-0.193043	-0.327804	-0.28149	0.0204742	0.0907308
240	0.209255	0.782009	0.13066	0.0393837	0.270835	0.933491	0.359084	0.307607	1.09787	0.0865115	0.359234	0.562719	0.256147	-0.0554741	-0.33806	-0.204421		-0.929078	-0.130506	-0.116504	-0.395319	-0.404429	-0.353933	-0.0297018	-0.16615	-0.246456	-0.262278	-0.35992	-0.219754	0.0397108	0.144463
245	0.168386	0.789114	0.226436	-0.0373311	0.138963	0.776805	0.595304	0.279001	1.46536	0.0320052	0.438936	0.446513	0.270267	-0.240887	-0.359916	-0.188259		-0.944369	-0.163633	-0.115841	-0.313988	-0.404429	-0.300744	-0.0013482	-0.186663	-0.26179	-0.330582	-0.347051	-0.229676	-0.0100178	0.094493
250	0.257394	0.734329	0.378492	-0.0432456	0.0648024	0.740675	0.667663	0.381639	1.5371	0.0253848	0.237326	0.482375	0.0788536	-0.203457	-0.394124	-0.248522		-0.943234	-0.178771	-0.202125	-0.304137	-0.355098	-0.229481	0.00153469	-0.167791	-0.257159	-0.325597	-0.331823	-0.337109	-0.0156017	0.093464
255	0.23224	0.600828	0.423696	-0.110798	-0.018326	0.638427	0.653806	0.307257	1.26747	-0.0187239	0.206646	0.43481	-0.0422251	-0.217056	-0.387813	-0.272217		-0.934722	-0.192851	-0.2756	-0.354262	-0.357995	-0.1934	-0.0193405	-0.273586	-0.317747	-0.245795	-0.331648	-0.237424	-0.0287867	0.111729
260	0.201577	0.519994	0.407746	-0.19906	0.101946	0.429961	0.765882	0.391287	0.953933	0.0372446	0.236555	0.428198	0.104828	-0.215814	-0.358335	-0.263425		-0.936078	-0.122516	-0.264178	-0.471424	-0.292629	-0.215775	-0.0455405	-0.247824	-0.359477	-0.331978	-0.351302	-0.238049	-0.0358615	0.056967
265	0.276042	0.622366	0.340548	-0.233605	0.177032	0.693988	0.819641	0.370448	1.19269	0.00552374	0.280853	0.487973	0.136863	-0.220393	-0.327859	-0.229598		-0.936078	-0.144932	-0.257005	-0.317718	-0.296916	-0.238251	-0.000195	-0.295856	-0.390578	-0.381872	-0.390464	-0.277738	-0.0444858	0.0440724
270	0.393208	0.58695	0.397007	-0.0638911	0.155338	0.573918	0.838334	0.379447	1.15132	-0.0372852	0.23588	0.466784	0.131186	-0.203402	-0.34621	-0.167447		-0.951857	-0.116383	-0.14182	-0.278761	-0.183409	-0.277301	-0.0394187	-0.261015	-0.383951	-0.262079	-0.358989	-0.232639	-0.0689847	0.0326249
275	0.290515	0.57577	0.292481	-0.0876115	0.16004	0.591908	0.720204	0.412839	0.72789	-0.0827343	0.192917	0.328895	0.0669399	-0.25352	-0.311261	-0.231608		-0.950596	-0.14585	-0.168793	-0.435683	-0.307671	-0.258893	-0.0251232	-0.240639	-0.410408	-0.276923	-0.369558	-0.238511	-0.0189637	0.0284768
280	0.414744	0.652966	0.423278	-0.220035	0.117976	0.700502	0.472418	0.562004	0.800504	-0.171642	0.147241	0.409437	0.154131	-0.212477	-0.310335	-0.270511		-0.959944	-0.1001	-0.221081	-0.429987	-0.289177	-0.181995	-0.0416741	-0.270672	-0.392979	-0.277033	-0.282964	-0.25474	-0.0393112	0.0676749
285	0.489023	0.761821	0.326428	-0.240727	0.101946	0.705519	0.460932	0.585748	0.970725	-0.160879	0.140466	0.3257	0.182488	-0.245466	-0.336778	-0.185599		-0.941217	-0.157846	-0.195705	-0.350264	-0.347061	-0.23465	-0.0579876	-0.243511	-0.341469	-0.282395	-0.290797	-0.209587	-0.0175312	0.0700223
290	0.37086	0.891115	0.325016	-0.19906	0.0563425	0.639999	0.576029	0.436868	1.05223	-0.310061	0.221917	0.304945	0.0715289	-0.243673	-0.350156	-0.256907		-0.957847	-0.103016	-0.244995	-0.371462	-0.375537	-0.313016	-0.0328729	-0.2111	-0.349574	-0.269346	-0.290069	-0.295191	-0.0251323	0.0265153
295	0.204314	0.781401	0.4582	-0.234609	0.155338	0.656435	0.573127	0.389601	0.932873	-0.443402	0.19198	0.38462	0.0900025	-0.330256	-0.337718	-0.296257		-0.959944	-0.141034	-0.2154	-0.295715	-0.243595	-0.225279	-0.0012803	-0.21393	-0.364096	-0.283348	-0.226739	-0.305847	-0.0463861	-0.0062517
300	0.200951	0.591104	0.436384	-0.235221	0.16004	0.650651	0.499523	0.454465	1.18746	-0.411803	0.181776	0.403381	0.217994	-0.292688	-0.316518	-0.192482		-0.96461	-0.091268	-0.236783	-0.319371	-0.247306	-0.100428	-0.0075039	-0.288492	-0.376659	-0.285807	-0.241181	-0.305385	-0.0578169	0.0616618

## Sheet: B
activation	no act
0.489023	-0.0749453
0.891115	-0.0618231
0.4582	0.0956941
0.428072	0.0294094
0.560704	0.227912
1.23413	0.0452861
0.838334	0.130731
0.605212	0.094443
1.04792	-0.0089341
0.251452	0.097246
0.456479	-0.0111411
0.643546	0.089644
0.633768	0.189225
0.270254
0.274597
0.439669

## Sheet: C
Time	cry-Gal4 dh44-LexA														Dh44-LexA
0	0.23468	0.231697	0.655606	0.221557	0.0715421	0.207058	0.143022	0.0393908	-0.0202537	-0.100857	0.00708968	0.081586			0.331387	0.241168	0.202076	0.0605244	0.140559	0.0782663	0.125737	0.116697	0.361927	0.418891	0.687607	0.179169	0.152444	0.189271	0.179825	0.103996	-0.0110804	0.113617
5	0.133281	0.107006	0.0760052	0.0347075	0.00852604	0.0907567	0.0368279	-0.0942696	0.0600611	-0.13733	-0.0625068	0.0173249			0.129528	0.150953	0.134293	0.0384279	0.175799	0.00886035	0.103001	0.111268	0.118185	0.136367	-0.0169573	0.0428518	0.10553	0.0578346	0.14569	0.0222122	-0.0208914	0.04925
10	0.142642	0.117887	-0.0427182	-0.0230696	-0.0473008	-0.0108254	0.0214225	0.002355	-0.0590894	0.0201768	-0.0015829	-0.0148732			0.09489	0.0967299	0.0647147	0.0231491	-0.0853621	0.118741	0.121738	0.0540844	0.0611253	0.00203321	-0.0814693	0.0423389	0.0936022	-0.0400921	0.0999301	-0.0555872	-0.0509887	0.00579297
15	0.020009	0.0877061	-0.141084	-0.0818883	-0.0110366	-0.0104007	0.00737831	0.0238504	-0.0743883	0.0309799	-0.0212311	-0.0057616			0.0373934	0.079172	0.049685	0.0525728	0.172976	0.0803627	0.00953868	0.00813189	-0.0689496	-0.133498	-0.0525128	-0.0370153	0.0590844	0.00149374	-0.054076	0.0285241	-0.0531699	-0.0412788
20	-0.0095781	0.0417551	-0.184934	-0.0711994	0.0296047	-0.025726	0.00150997	0.00819244	-0.058836	0.0262785	-0.0170001	-0.0051462			0.0114816	0.0581501	-8.522e-05	0.0324857	0.0873273	-0.0059894	0.0354899	-0.005627	-0.0742204	-0.0938198	-0.156857	-0.0088613	-0.0287524	-0.0530358	0.0297881	0.0257715	-0.0191859	-0.0201453
25	-0.0565441	-0.0446067	-0.140219	-0.037866	0.0172558	-0.0904547	-0.0268606	-0.0284646	0.0105795	0.0109884	0.00223306	-0.0050711			-0.0328642	0.0275428	0.010872	0.0217712	-0.0058002	-0.0479181	-0.0258331	-0.013014	-0.0166036	-0.0095757	-0.061593	-0.0432656	-0.0734349	0.0867032	0.0182774	-0.0110838	-0.0449656	-0.171319
30	-0.0339676	-0.125899	0.0108965	0.0209764	0.0157398	-0.0295858	-0.0408798	0.0380587	-0.0054798	-0.0029074	-0.0191554	-0.0282778			-0.101512	-0.0348905	-0.0206057	0.0689783	-0.0333893	-0.093844	-0.183718	-0.0428304	-0.0285181	-0.0630256	-0.126686	-0.029516	-0.0385737	-0.0518282	0.0808211	-0.0329876	0.0157585	-0.08946
35	-0.109782	-0.121373	0.0261738	0.0300318	-0.0973321	-0.0694725	-0.0689682	-0.0250562	0.0308573	0.019414	0.0120999	-0.0017538			-0.0795487	-0.02187	-0.0338457	-0.0140971	-0.0603106	-0.0438091	-0.0651517	-0.0061116	-0.0128868	-0.0359707	-0.0430894	0.0540524	0.096544	-0.0669229	0.0476497	-0.0473972	0.108806	-0.0581713
40	-0.110897	-0.106182	0.00098786	-0.0257803	0.0837932	-0.0406646	-0.0066327	0.0741411	0.0517508	0.0937314	0.0714883	-0.0113607			-0.117796	-0.0493557	-0.0503363	0.00070091	-0.118007	-0.0590222	-0.0566876	-0.103072	-0.0270158	0.0565585	0.0239302	-0.0321512	-0.0967806	-0.102773	-0.067458	-0.0599101	0.0925681	-0.0312578
45	-0.0823169	-0.035373	-0.0478707	-0.007705	0.00710775	-0.024217	-0.0427059	-0.020616	0.0417386	0.034877	0.0215288	-0.0001926			-0.09812	-0.0870709	-0.0129356	-0.0582757	-0.0203007	0.00071221	-0.0402722	-0.0469495	-0.0698431	0.0559108	-0.0571849	-0.118004	-0.10924	-0.0194501	-0.205417	-0.0087191	0.00510373	-0.0592629
50	-0.0877831	-0.0769969	-0.0641929	-0.0071605	-0.0458091	0.0133872	-0.0115465	0.0112222	-0.0053169	0.039197	0.0136979	-0.0143028			-0.0919704	-0.0630782	-0.0480353	-0.176279	-0.128864	-0.068582	-0.0278555	-0.0359738	-0.127304	-0.0950663	-0.0910775	-0.0391021	-0.0696746	0.017079	-0.167709	0.0084061	-0.042192	0.17156
55	-0.0397427	-0.0756209	-0.14865	-0.0526032	-0.0320908	-0.0098548	-0.0125674	-0.0288041	0.0283769	-0.0345482	-0.0066613	-0.0121712			-0.0828688	-0.134418	-0.043902	-0.0499581	-0.124628	0.0322216	0.0040131	-0.0366025	-0.115895	-0.178076	-0.0241106	-0.0104962	-0.0907481	-0.0182803	-0.10732	0.0267752	0.0202376	0.244292
60	-0.0539654	-0.12704	-0.126383	-0.0519759	-0.0520936	-0.0392466	0.00297083	0.0481143	0.0430965	0.00566725	-0.0474592	0.00225412			-0.103562	-0.0218642	-0.0498189	-0.146044	0.0980691	-0.177855	-0.148179	0.0448245	-0.145319	-0.0607283	-0.179188	-0.045789	-0.0896321	-0.0039026	-0.160111	0.0600959	0.0238371	0.0327422
65	-0.189827	-0.260783	-0.189546	-0.112925	-0.0104741	-0.0495595	-0.0208677	0.0471087	0.116622	0.00146634	-0.0377402	0.00313975			-0.0993686	-0.0276549	-0.0305342	-0.17714	0.00515149	-0.0455491	-0.223492	0.029042	-0.0910043	-0.022871	-0.236969	-0.0938514	-0.0348936	-0.0129217	-0.113671	0.0571524	-0.0430806	-0.0269452
70	-0.0529179	-0.0652828	-0.125482	-0.104261	0.247899	-0.0389811	-0.0289606	0.136564	0.160762	-0.0073228	-0.0275664	-0.0525802			-0.146472	-0.0343799	-0.0735961	-0.0682008	0.0394375	-0.114892	-0.0735927	0.0263701	-0.0580452	-0.115877	-0.307789	-0.0438596	-0.0201444	-0.0451111	-0.200144	0.0507235	0.0116294	0.0444543
75	-0.0695984	0.00612408	-0.147858	-0.156734	0.497836	-0.0080045	0.010466	0.192	0.289147	0.0406271	0.0185545	-0.0918034			-0.13117	-0.0398108	-0.0971481	-0.0990527	0.0403152	-0.14049	-0.0528617	-0.025509	-0.123199	-0.11039	-0.293324	-0.138974	-0.137691	-0.134736	-0.144007	0.0295155	0.0134696	0.0972791
80	-0.056074	-0.0202733	-0.236783	-0.0954892	0.215474	-0.0648392	-0.047711	0.0806838	0.179664	0.0323147	-0.0434556	-0.188593			-0.161196	-0.0685498	-0.118058	-0.0773078	0.0618751	-0.115696	-0.0630544	0.0147985	-0.139815	-0.115694	-0.197638	-0.0969182	-0.106819	-0.158472	-0.252934	0.00644788	-0.0402531	0.04891
85	-0.108331	0.0138188	-0.155496	-0.169542	0.146956	-0.0244521	0.0952207	0.254762	0.263455	0.0521215	0.0353366	-0.0031798			-0.206639	-0.0865893	-0.105877	-0.10028	0.0693353	-0.147778	-0.0371954	0.0197035	-0.1879	-0.256809	-0.272471	-0.0475966	0.00452911	-0.187114	-0.207799	-0.0027459	-0.031259	0.0461811
90	-0.0746213	-0.0601772	-0.0735611	-0.14021	0.153999	-0.028145	0.101512	0.211249	0.236533	-0.0183584	-0.0344134	-0.106994			-0.220981	-0.0948113	-0.185932	-0.0957156	0.0208349	-0.113257	-0.0334329	-0.0396804	-0.201848	-0.32887	-0.275533	-0.0750702	-0.0044681	-0.140019	-0.275276	-0.0016375	-0.0609344	0.0457695
95	-0.117504	-0.0706601	-0.10181	-0.135333	0.101204	-0.0308749	0.0733245	0.122303	0.352207	-0.0138893	-0.139291	-0.0528955			-0.243976	-0.118729	-0.138353	-0.0768773	0.0409257	-0.0570026	-0.0508278	-0.0652467	-0.157311	-0.213648	-0.276932	-0.0184829	-0.0634476	-0.123037	-0.215624	0.0268922	-0.104245	-0.0015259
100	-0.115571	-0.108898	-0.183277	-0.167778	-0.184361	-0.0083306	0.0692407	0.165098	0.282176	0.0157018	-0.110982	-0.084253			-0.234406	-0.125976	-0.176229	-0.118358	0.0384072	-0.0374709	-0.0756382	-0.049438	-0.233395	-0.296231	-0.343767	-0.0650576	0.0173209	-0.130698	-0.285709	0.0474536	0.0706571	-0.0438198
105	-0.0727276	-0.0716921	-0.236423	-0.192992	-0.211627	-0.0552088	0.0903484	0.315043	0.464496	0.0709809	-0.111352	0.0073878			-0.247932	-0.116355	-0.133118	-0.11942	-0.0585935	-0.0877154	-0.0638553	-0.0877809	-0.155057	-0.271473	-0.198694	-0.0152131	-0.0055727	-0.0991122	-0.335381	0.0106168	0.0124283	0.025817
110	-0.0191942	0.0170053	-0.137805	-0.231971	-0.0975033	-0.0570666	0.132639	0.254854	0.24783	0.0547255	-0.112182	-0.0276023			-0.221161	-0.127885	-0.196049	-0.101213	-0.0171526	-0.117478	-0.0662003	-0.0481021	-0.16477	-0.193486	-0.298973	0.0183687	0.0288306	-0.120245	-0.334814	0.00261148	-0.0572002	-0.0559434
115	0.0107018	-0.0970937	-0.104764	-0.227059	0.109616	-0.0522211	0.134008	0.622887	0.367434	0.0916398	-0.116367	0.0084986			-0.243392	-0.125668	-0.198764	-0.12247	0.0182019	-0.0896371	-0.0853008	-0.0648276	-0.142236	-0.205339	-0.266479	-0.0459972	-0.068467	-0.156925	-0.321942	-0.0117304	-0.101085	0.00645507
120	0.0343123	0.00655861	-0.142093	-0.193903	0.244525	-0.0923959	0.10128	0.448795	0.257662	0.085699	-0.160953	-0.0447596			-0.24324	-0.140545	-0.159951	-0.148829	0.0441311	-0.111433	-0.0941048	-0.0211279	-0.191953	-0.189648	-0.336957	-0.119147	-0.182889	-0.166925	-0.390326	-0.0501436	-0.127556	-0.0498861
125	0.0109838	-0.0767434	-0.2241	-0.216216	0.336982	-0.0403233	0.171459	0.451315	0.31243	0.126558	-0.0431883	-0.126073			-0.210529	-0.0889567	-0.160244	-0.175368	0.0436351	-0.104899	-0.0564053	-0.0082923	-0.21248	-0.162141	-0.0629392	-0.174236	-0.199865	-0.117981	-0.31355	-0.057139	-0.0508541	0.00699191
130	0.0340437	-0.185357	-0.262618	-0.260227	0.381927	-0.0188179	0.209425	0.42969	0.321899	0.0574963	-0.0976917	-0.153963			-0.250501	-0.132799	-0.188075	-0.172928	0.048901	-0.136856	-0.0892303	-0.0732099	-0.291841	-0.184443	-0.0595078	-0.24337	-0.263308	-0.0894517	-0.201788	-0.0836305	-0.10332	-0.0462624
135	-0.0055624	0.0461909	-0.308161	-0.285416	0.291475	-0.181534	0.119566	0.325673	0.132862	0.0761591	-0.109424	-0.240125			-0.15164	-0.022839	-0.14536	-0.184482	0.0442837	-0.235102	-0.122176	-0.0844083	-0.262003	-0.263762	-0.0629129	-0.241425	-0.298948	-0.240323	-0.0616743	-0.0807116	-0.147088	-0.130448
140	0.075745	0.104689	-0.348733	-0.31682	0.286706	-0.115668	-0.0922672	0.281873	0.0992951	0.107985	-0.0446157	-0.210013			-0.189569	-0.0237151	-0.0784295	-0.202344	-0.0054186	-0.241258	-0.0711555	-0.0921751	-0.259154	-0.22753	-0.137508	-0.273083	-0.287232	-0.0309975	-0.0146672	-0.0549037	-0.0767774	-0.0482308
145	0.142991	0.221268	-0.323331	-0.289559	0.293871	-0.409563	-0.157815	0.410493	0.263292	-0.0043255	-0.0272365	-0.233145			-0.177169	-0.0329989	-0.12042	-0.176021	0.0351065	-0.163627	-0.144843	-0.102967	-0.295156	-0.175742	0.0112337	-0.259292	-0.351243	0.0294944	0.211806	-0.0693133	-0.0989935	-0.12796
150	0.220054	0.163766	-0.266545	-0.363233	0.313165	-0.407979	-0.50252	0.428906	0.275006	0.0791205	-0.0243874	-0.19892			-0.0296451	0.049493	-0.0549749	-0.149905	0.0019652	-0.197799	-0.133055	-0.0994966	-0.264593	-0.202907	0.0550776	-0.161345	-0.246436	0.198366	0.334341	-0.0948995	-0.087118	-0.124748
155	0.174163	0.0900417	-0.398708	-0.405705	0.321185	-0.388649	-0.429651	0.337596	0.370548	0.0640867	-0.0529869	-0.188413			0.0288548	0.133203	0.0230163	-0.16629	-0.0412119	-0.121433	-0.0830594	-0.0925222	-0.262806	-0.205412	0.119062	-0.12332	-0.20667	0.4689	0.33678	-0.0244835	-0.0397056	-0.056865
160	0.0964546	0.0472953	-0.439316	-0.459303	0.378284	-0.342962	-0.331275	0.521299	0.527375	0.0454001	-0.0263721	-0.195318			0.0175373	0.146294	6.0874e-05	-0.287228	0.00106846	-0.0778831	-0.0729186	-0.104991	-0.228474	-0.199559	0.15533	-0.147316	-0.202314	0.357426	0.362863	-0.0322363	-0.0630797	-0.115944
165	-0.0462295	0.0211876	-0.366748	-0.504853	0.404913	-0.419793	-0.264341	0.449252	0.495347	0.0824098	-0.0029591	-0.290501			-0.0511757	0.143984	-0.006343	-0.211114	-0.0471457	-0.0728587	-0.0624609	-0.110125	-0.203492	-0.323383	0.263686	-0.250651	-0.284159	0.538675	0.239987	-0.0179191	-0.0819567	-0.113323
170	-0.0136609	-0.089236	-0.525683	-0.510014	0.396184	-0.387823	-0.266956	0.506373	0.283968	0.0778573	-0.0250584	-0.273374			-0.0328065	0.153407	0.00869883	-0.209054	-0.104938	-0.0818035	-0.0448355	-0.113459	-0.300258	-0.273062	0.148203	-0.233149	-0.280799	0.224253	0.273952	-0.0330923	-0.0016823	-0.020351
175	-0.0750511	-0.140293	-0.583693	-0.469471	0.278148	-0.341771	-0.255452	0.498054	0.457742	0.00451722	-0.0604595	-0.293983			-0.0306773	0.148191	0.0229554	-0.241349	-0.100149	-0.140755	-0.0721753	-0.141002	-0.219137	-0.1874	0.207145	-0.140431	-0.249572	0.23165	0.401762	-0.0444352	-0.0289431	-0.0826958
180	-0.0682016	-0.131548	-0.490841	-0.570632	0.42428	-0.135467	-0.186103	0.601705	0.462214	-0.0078472	-0.0942852	-0.257252			-0.0449468	0.153071	0.0401887	-0.118286	0.0253377	-0.117415	-0.0421793	-0.123773	-0.29943	-0.184247	0.28116	-0.0757861	-0.294564	0.380219	0.234033	-0.0496263	0.031431	-0.0512729
185	0.0822319	-0.108753	-0.621779	-0.584907	0.292111	-0.121249	-0.0273918	0.486027	0.259146	0.0151118	-0.076724	-0.1571			-0.0683756	0.0701378	-0.0528687	-0.158833	0.0650996	-0.145759	-0.0615275	-0.101553	-0.326574	-0.187437	0.172672	-0.114664	-0.229895	0.480976	0.19332	-0.075034	-0.0508002	-0.153299
190	0.0241456	-0.110473	-0.65327	-0.618276	0.295779	-0.109374	-0.0491304	0.554666	0.415575	0.0239069	-0.0249845	-0.139102			-0.125627	0.0674165	-0.0717212	-0.133845	0.0762612	-0.137422	-0.0397075	-0.0904724	-0.318337	-0.11848	0.0436481	-0.133886	-0.185659	0.438484	0.242766	-0.0350259	-0.0631605	-0.0569366
195	0.0728037	0.0290815	-0.706164	-0.651006	0.344123	-0.127346	0.0226509	0.484016	0.380596	0.0317903	0.00527556	-0.114515			-0.234167	-0.0427816	-0.105147	-0.160943	0.0751355	-0.0964855	-0.0924915	-0.112954	-0.327843	-0.115168	0.025646	-0.0996701	-0.237324	0.489278	0.33196	0.0194227	0.0417985	-0.0028322
200	0.132596	0.0447968	-0.732899	-0.640234	0.304582	-0.139608	-0.0002746	0.510526	0.410542	0.0345254	-0.0278109	-0.0865946			-0.245817	-0.0669194	-0.148057	-0.152769	0.0559223	-0.0439279	-0.0240124	-0.116013	-0.385421	-0.20562	0.00030575	-0.0455351	-0.253235	0.502373	0.295273	-0.0018592	0.131031	-0.005078
205	0.250326	0.0994383	-0.55721	-0.640163	0.231197	-0.19259	0.0655803	0.410297	0.558516	0.0646527	0.00209658	-0.0938298			-0.178562	0.0490114	-0.0737118	-0.127012	0.15153	-0.179148	-0.0550916	-0.0852334	-0.38116	-0.261526	0.0664807	0.011042	-0.236271	0.369955	0.354981	-0.0605875	0.131758	0.0766735
210	0.24478	0.0495041	-0.58726	-0.670928	0.108882	-0.0839712	0.103488	0.354626	0.252755	0.0422002	-0.0494269	-0.0087938			-0.0675816	0.132217	-0.0055578	-0.13495	0.118771	-0.174075	-0.0515653	-0.0988875	-0.409846	-0.197982	0.00650883	-0.017376	-0.159847	0.300934	0.117905	-0.0394103	0.0283342	0.0174424
215	0.097247	-0.0700445	-0.559913	-0.677687	0.128323	-0.0372371	-0.0179792	0.44745	0.288875	0.0283164	-0.0093853	-0.166287			-0.0637201	0.161623	0.0862761	-0.117224	0.193372	-0.16752	-0.0440001	-0.0671131	-0.365153	-0.23854	-0.0336924	-0.109261	-0.195063	0.360181	0.256204	0.0595909	0.216637	0.0508963
220	0.0249917	-0.0608289	-0.590503	-0.674562	0.105214	-0.096377	-0.0692421	0.241938	0.495926	0.0473128	-0.0148163	-0.0600256			-0.0062307	0.137259	0.0925826	-0.08203	0.145577	-0.186772	-0.0301833	-0.090289	-0.358147	-0.308169	-0.0358833	-0.165062	-0.184703	0.44973	0.340635	0.0347067	0.166371	-0.0296562
225	0.0562173	-0.102036	-0.628697	-0.662334	0.182266	-0.258199	0.0278967	0.44506	0.53096	0.025778	-0.0195023	-0.0059868			-0.0537308	0.130209	0.128321	-0.0962754	0.186675	-0.183327	0.0132032	-0.119974	-0.472824	-0.314121	-0.0385757	-0.10363	-0.184846	0.245575	0.334568	0.0680704	0.263368	-0.0812016
230	-0.0782207	-0.171542	-0.674853	-0.657599	0.169453	-0.10506	-0.0926075	0.641796	0.31998	-0.0131564	-0.0388606	-0.0388154			-0.0881595	0.0812202	0.173161	-0.0637442	0.144528	-0.223131	-0.0669955	-0.115227	-0.459381	-0.358063	-0.166834	-0.0553751	-0.135196	0.587658	0.295953	0.0887057	0.235254	0.0187039
235	-0.0668451	-0.278816	-0.610933	-0.677154	0.232445	-0.217736	-0.0524256	0.494646	0.139453	0.103808	-0.0042728	-0.0457653			0.0328606	0.133714	0.120426	-0.0713442	0.106369	-0.211063	-0.0298779	-0.239941	-0.329669	-0.348263	-0.189561	-0.0370204	-0.201101	0.325199	0.351806	0.116527	0.248898	-0.0786159
240	-0.155808	-0.333367	-0.647541	-0.669744	0.305902	-0.110823	-0.124489	0.747797	0.0673575	0.105196	-0.0493529	-0.0720042			0.0301107	0.162778	0.157894	-0.0228094	0.0132412	-0.151237	-0.0363023	-0.237727	-0.305154	-0.320463	-0.0382853	-0.0492264	-0.151651	0.260858	0.201089	0.114865	0.291795	-0.0244668
245	-0.175994	-0.322123	-0.685842	-0.654048	0.399436	-0.241273	-0.055754	0.496409	0.178795	0.11709	0.0100526	-0.0483322			0.083818	0.160997	0.102487	-0.0306964	0.114687	-0.177478	-0.0418509	-0.214191	-0.342542	-0.316638	-0.153029	-0.0047385	-0.116515	0.46407	0.288752	0.0884286	0.172241	0.0781856
250	-0.295242	-0.405661	-0.714451	-0.642744	0.265359	-0.21311	-0.0248519	0.493457	0.0711234	0.155887	-0.0404984	-0.0379747			0.144375	0.184415	0.0755075	-0.0282779	0.158418	-0.187191	-0.0606171	-0.126628	-0.39345	-0.397081	-0.265503	0.0068278	0.00461496	0.534298	0.271741	0.0652008	0.166586	0.0321965
255	-0.303139	-0.442414	-0.7062	-0.666844	0.209067	-0.319181	-0.18548	0.553973	0.0285942	0.122804	-0.0804603	0.0456803			0.10013	0.198132	0.0736996	-0.0449992	0.110223	-0.116478	-0.0350059	-0.188127	-0.502338	-0.295632	-0.295647	0.0291632	-0.050879	0.317614	0.250647	0.0857314	0.289156	0.110852
260	-0.238203	-0.446615	-0.7062	-0.678456	0.174882	-0.388907	-0.196885	0.441025	0.225869	0.126832	0.010462	0.0390605			0.0898953	0.157138	0.0408827	-0.0835945	0.115184	-0.126905	-0.0431934	-0.195154	-0.445913	-0.329676	-0.192518	-0.0084094	-0.0218786	0.285387	0.252008	0.0282532	0.237974	-0.0364383
265	-0.228574	-0.472795	-0.717442	-0.681652	0.217944	-0.346435	-0.260955	0.391126	0.173309	0.13372	0.0316003	0.0430834			0.0916637	0.130331	0.0656825	-0.100703	0.0866977	-0.122984	0.0421736	-0.226739	-0.432561	-0.244846	-0.246234	0.0205519	0.0267645	0.203423	0.19247	0.0114173	0.15848	0.0440337
270	-0.227284	-0.37624	-0.759563	-0.702024	0.310059	-0.295689	-0.185472	0.443898	0.333559	0.0712312	0.0562758	0.0268117			0.051865	0.12139	0.0125095	-0.104421	0.0172289	-0.119204	0.0321538	-0.171218	-0.569564	-0.276031	-0.245231	0.0437098	0.0172064	0.319123	0.297314	0.0269354	0.117989	0.115881
275	-0.25898	-0.357193	-0.77257	-0.693182	0.270543	-0.433033	-0.298381	0.365164	0.380306	0.1179	0.0328628	0.0455152			0.0318429	0.110145	0.0120773	-0.111791	0.0919446	-0.0993576	-0.005684	-0.113629	-0.502338	-0.294617	-0.273369	0.00123761	-0.119892	0.585091	0.129643	-0.0667701	0.22424	0.00318931
280	-0.292878	-0.369722	-0.615689	-0.668111	0.268538	-0.331178	-0.310309	0.520451	0.402938	0.0590337	0.0524087	0.0532307			-0.0484546	0.101076	0.0184995	-0.134411	0.0461154	0.0222007	-0.0059779	-0.165279	-0.445913	-0.396678	-0.284138	-0.013106	-0.0736066	0.521845	0.168144	-0.0572991	0.23038	0.123969
285	-0.285169	-0.342093	-0.561498	-0.688683	0.241101	-0.292588	-0.272841	0.47063	0.177274	0.0558874	-0.0302392	0.032726			-0.0318682	0.0750059	0.014074	-0.118709	0.0522209	0.0618303	-0.0624955	-0.126235	-0.449073	-0.35298	-0.327665	-0.104326	-0.16181	0.504373	0.189124	-0.147384	0.174315	0.0907297
290	-0.251445	-0.375986	-0.647469	-0.670288	0.313801	-0.411452	-0.297759	0.624428	0.310257	0.00601286	0.00485473	0.0412221			-0.0271983	0.0692384	0.0412296	-0.104485	0.0626574	-0.069742	-0.109045	-0.216719	-0.422252	-0.4121	-0.21696	-0.172444	-0.198314	0.453919	0.179315	-0.103662	0.202024	0.0845829
295	-0.267266	-0.424399	-0.615689	-0.723271	0.355689	-0.455585	-0.278004	0.579596	0.352171	0.0180912	0.0201866	0.0585595			-0.0767771	0.0482629	0.0199239	-0.09939	0.0497024	-0.122181	-0.0993423	-0.201821	-0.39345	-0.410487	-0.270333	-0.167174	-0.185528	0.348067	0.253426	-0.097726	0.189179	0.0566942
300	-0.179768	-0.472505	-0.643902	-0.709363	0.469812	-0.434746	-0.249193	0.447385	0.372539	0.0462998	-0.0814555	0.0557375			-0.0738827	0.0347609	-0.0037863	-0.190675	0.0162558	-0.0705247	-0.116282	-0.154336	-0.494283	-0.417904	-0.312065	-0.163178	-0.164895	0.324822	0.219517	-0.135942	0.212338	0.0985765

## Sheet: D
cry-G4 Dh44-LexA	Dh44-LexA
0.0084986	0.0571524
0.126558	0.0706571
0.0353366	0.0972791
0.0211467	0.538675
0.622887	0.401762
0.527375	0.0183687
-0.0080045	0.0288306
0.209425	0.28116
0.497836	-0.0580452
-0.0735611	-0.11039
-0.0954892	-0.0374709
0.220054	-0.0334329
0.221268	0.029042
	-0.0682008
	0.0762612
	0.0288548
	0.153407
	0.0401887

## Sheet: E
	AHL																											CCHa1 1 uM
0	0.00233968	-0.138234	-0.0456525	-0.0288828	-0.0606181	0.0379216	-0.0947993	0.00415967	0.0525036	0.00677966	-0.0134709	0.0211723	-0.0711604	-0.0138726	-0.0192151	-0.0457957	0.0163998	-0.0287084	-0.0424911	0.0414225	-0.0574	-0.0527825	0.00548924	-0.0283869	0.105405	-0.0017803		0.114085	0.0971274	0.063672	-0.0735907	0.0741354	0.036064	0.0207235	0.096004	0.0853028	0.0130204	0.0332795	0.0414062	0.120245	0.112892	0.0936686	-0.0224338	-0.035834	-0.0491925	-0.115884	-0.0860968	-0.0499445	-0.110606
10	0.0022062	-0.0537115	-0.0624683	0.0499068	-0.0253546	0.0885683	0.0350962	-0.0126698	0.0761573	0.0399339	0.024258	-0.100108	0.00748888	0.0197155	-0.0541557	0.0177231	0.0214332	0.00614466	-0.0241362	0.0251575	-0.0325501	-0.0105958	0.012523	-0.0014401	0.124831	-0.0041017		0.0640012	0.0413157	0.00474102	-0.035185	0.0508178	0.0534518	0.013665	-0.0232091	-0.0235352	0.0455886	-0.0023585	-0.0085461	-0.03527	0.0156189	0.116964	0.0943247	0.0311977	0.0247185	-0.0455551	-0.0602018	-0.0124643	-0.0295613
20	0.0234821	-0.0385486	-0.0531464	0.120233	0.142318	0.0347422	0.0349174	0.0230499	0.0490838	0.0420008	-0.0063703	0.0151758	0.0472523	-0.0378042	-0.0141167	-0.0233587	0.0507899	0.0279897	0.0485498	-0.0307685	0.0380663	0.00195353	0.00107557	0.0210156	0.095109	0.0399142		0.0219413	0.010807	-0.0131688	0.0275885	0.0508897	0.00576054	-0.0164698	0.0220142	-0.0247842	-0.0964944	-0.0151169	0.00842797	0.00508479	-0.0039414	0.042774	0.0624844	0.00770075	0.0668165	-0.0454804	-0.0336007	0.0377173	-0.0237692
30	0.00754556	0.0246124	0.0141743	0.0328794	0.0249854	-0.0043064	0.015518	-0.0233171	-0.0150947	-0.0057048	9.6271e-05	0.066651	0.0775216	0.0356699	0.0158615	0.0435573	-0.0019591	0.00557909	0.0220613	0.0293177	0.0265838	0.0381681	0.0215613	0.00881889	0.0479349	0.0863965		-0.0235937	0.00278586	-0.0095297	0.0418832	-0.0123265	-0.0194191	0.00725553	0.00818248	0.0107775	-0.0280689	0.0165283	-0.0818331	-0.109779	0.0344482	-0.0260605	0.0413442	-0.0459103	-0.0495417	0.0792393	0.00891414	0.0159079	0.0259887
40	-0.045418	0.13539	0.0684404	0.0190761	-0.0158147	-0.0562965	-0.0546148	0.0291177	-0.04422	-0.0338156	-0.0019184	0.0400133	-0.0402049	-0.0025366	0.0621544	0.00326548	-0.0158955	0.0206727	0.0102886	-0.0318968	0.00893882	0.0210801	-0.0140118	0.0135152	-0.182039	-0.0325207		-0.0554155	-0.0449515	-0.0175319	0.0210571	-0.0665964	-0.000667	6.9542e-05	-0.0199994	-0.086017	0.0891832	0.0152469	-0.0653253	-0.138108	-0.0626087	-0.178809	-0.0326142	-0.0360636	-0.0221979	0.0482463	0.0580204	-0.0179541	0.0344261
50	0.00984445	0.0704912	0.0786524	-0.193213	-0.0655158	-0.100629	0.0638824	-0.0203404	-0.11843	-0.0491939	-0.0025946	-0.0429041	-0.0208976	-0.0011721	0.00947159	0.00460854	-0.0707684	-0.0316777	-0.0142723	-0.0332324	0.0163612	0.00217649	-0.0266373	-0.0135228	-0.191241	-0.0879079		-0.121018	-0.107084	-0.0281826	0.0182469	-0.09692	-0.0751902	-0.0252437	-0.0829922	0.0382561	-0.0232289	-0.0475793	0.10587	0.157827	-0.0964094	-0.0485373	-0.143105	0.0789094	0.0293971	0.0794337	0.112965	0.0267377	0.103522
60	-0.0455144	0.131045	0.00766617	-0.141878	-0.1995	-0.0975841	0.021463	-0.0229736	-0.044904	-0.0492766	-0.0082723	0.0137405	0.0826437	-0.0316114	0.0293211	0.0185922	-0.0790895	-0.0516139	0.00794719	-0.0744668	0.0736101	-0.0246102	-0.0377858	0.0264415	0.00330504	-0.0905739		-0.073575	-0.0631895	-0.0626304	0.0852421	-0.12022	0.108632	0.0729726	0.0153962	0.207819	-0.0166675	0.0381823	-0.0591326	0.0925498	0.375569	0.21956	0.401297	0.166237	0.0683329	0.310812	0.0620694	0.194176	0.135128
70	-0.0383952	0.12647	-0.0947504	-0.23024	-0.252736	-0.103898	-0.0506813	0.0267135	-0.062972	-0.0865647	-0.0150911	0.00829134	-0.0068719	-0.055438	-0.0303635	0.0392911	-0.0981758	-0.043802	-0.0015876	-0.0826032	0.0105157	-0.0026649	-0.007277	0.0266695	-0.132606	-0.16553		-0.273108	-0.16796	-0.130802	-0.372856	-0.417079	0.0493891	0.197371	-0.0761094	-0.0251701	-0.0555414	-0.492024	-0.299903	-0.273496	0.117319	0.108021	0.0505829	-0.200543	-0.160832	-0.136576	0.035327	0.112728	0.0475155
80	-0.0329372	0.0274853	-0.148796	-0.184145	-0.293238	-0.118855	-0.0495191	-0.0831934	-0.063542	-0.0505167	-0.0146966	0.025466	-0.005723	-0.0473558	0.122315	0.0501936	-0.1321	-0.0451099	-0.0167172	-0.0837545	-0.0157932	-0.0344681	-0.0221533	0.0125577	-0.0183798	-0.024414		-0.330193	-0.230784	-0.205528	-0.546779	-0.38133	-0.410105	-0.287069	0.222894	0.399205	0.318967	0.0388137	0.534214	0.351101	0.279568	0.288862	0.432488	0.100153	0.0325196	0.211674	0.145875	0.0778924	0.130385
90	-0.0826971	-0.0362875	-0.246983	-0.1448	-0.341151	-0.266451	-0.116478	-0.0398031	-0.0920404	-0.0381976	0.00757723	0.0813929	0.0280727	0.0239141	0.0750702	-0.0367103	-0.147579	-0.0594612	-0.0113574	-0.0836087	-0.0679127	-0.0627837	-0.0694551	0.00822615	-0.177806	0.00926444		-0.550509	-0.491586	-0.504108	-0.358586	-0.473486	0.0839827	0.441092	0.350589	0.379687	0.395112	0.282894	0.503791	0.465767	0.417302	0.321661	0.38467	0.263168	0.0610605	0.341237	-0.0069524	0.185517	0.139278
100	-0.109698	-0.0188546	0.0967794	-0.250038	-0.33259	-0.305545	-0.204446	-0.0926958	-0.0978541	-0.0402646	-0.0830115	0.0590732	-0.0546614	-0.0027465	0.0199402	0.0173281	-0.196429	-0.101737	-0.0467319	-0.0891583	-0.121654	-0.0502025	-0.0293629	0.0406672	-0.180731	0.00614506		-0.319819	-0.218017	-0.209605	0.443687	-0.0521352	0.00671558	0.163481	0.411674	0.388969	0.350103	0.241852	0.641934	0.522188	0.208988	0.220561	0.384216	0.408585	0.099258	0.527285	0.146628	0.00867135	0.0555425
110	-0.101615	0.048474	0.00098579	-0.271901	-0.246944	-0.299231	-0.23435	-0.17524	-0.21675	-0.0997933	-0.0061308	0.0518847	-0.0520446	-0.0716023	0.0537932	-0.0017117	-0.261194	-0.160415	-0.0523455	-0.0997279	-0.0749181	-0.0609682	-0.0121478	0.021882	-0.175452	-0.0265359		-0.408725	-0.288968	-0.554598	0.424324	-0.0678719	0.247142	0.417228	0.484064	0.494232	0.55359	0.392761	0.720183	0.509925	0.365606	0.329877	0.470254	0.218757	0.113304	0.457958	0.191073	0.168823	0.086282
120	-0.101615	0.0200812	-0.165488	-0.232759	-0.0999702	0.0480867	-0.0611409	0.0366738	-0.242797	-0.115172	-0.0459307	-0.0910466	0.0230304	0.0897259	-0.245649	-0.127011	-0.261049	-0.241927	-0.07622	-0.023108	-0.0903337	-0.0817987	0.0794489	-0.0204533	-0.17802	-0.015745		-0.098276	-0.0168155	-0.16222	0.327213	0.383605	0.473577	0.340396	0.278883	0.256602	0.453687	0.347299	0.6676	0.529657	0.299967	0.309467	0.0449488	0.204734	0.159921	0.461173	0.128973	0.27268	0.0670356
130	-0.0880217	-0.0826806	0.155247	-0.133314	-0.163981	-0.0067693	-0.0846973	-0.0593802	-0.130969	-0.0730054	-0.0781228	-0.139931	-0.020036	0.0668439	-0.224168	-0.167935	-0.295061	-0.277947	-0.0433656	-0.0171976	-0.0998858	-0.0987116	0.0729251	0.00109049	-0.170744	-0.0034851		-0.209192	-0.23429	-0.369536	0.324402	0.435953	0.742276	0.626305	0.305421	0.263375	0.498219	0.455884	0.696139	0.630375	0.334986	0.290812	0.311865	0.220767	0.171792	0.586012	0.114566	0.33691	-0.111153
140	-0.11457	-0.0019537	0.0177442	-0.261121	-0.21364	-0.0197556	-0.129977	0.0159518	-0.203298	-0.101364	-0.0032286	-0.0882247	0.0910527	0.122684	-0.203503	-0.0904327	-0.339489	-0.339771	-0.0460266	-0.0422822	-0.14074	-0.125785	0.0549539	-0.0074358	-0.123356	-0.0539574		-0.153368	-0.313102	-0.383597	0.233861	0.159771	0.742231	0.581289	0.313208	0.107227	0.443615	0.606403	0.857505	0.68959	0.306695	0.244233	0.292949	0.268364	0.156849	0.691385	0.355859	0.476101	0.310443
150	-0.117269	-0.0222951	-0.0778102	-0.250138	-0.186937	-0.0443849	-0.138023	-0.0641887	-0.189106	-0.0829268	-0.107075	-0.132572	0.0192169	0.0255935	-0.157822	-0.0722619	-0.379698	-0.359459	-0.0507188	-0.0534888	-0.173357	-0.128094	0.0872212	-0.0166005	-0.167011	0.00832137		-0.233059	-0.401636	-0.236527	0.146886	0.197334	0.868523	0.600726	0.34888	0.244193	0.482335	0.576634	0.866663	0.769547	0.295419	0.218858	0.22214	0.276273	0.107877	0.675463	0.159717	0.22135	0.0876046
160	-0.102905	0.102103	-0.0905297	-0.152357	-0.256186	-0.0717458	-0.173961	-0.135857	-0.216179	-0.124514	-0.13373	-0.16264	0.0125949	0.0275878	-0.197997	-0.136887	-0.409054	-0.39357	-0.0457539	-0.0246585	-0.0822952	-0.136376	0.0673333	-0.0144575	-0.117436	-0.0399202		-0.173146	-0.21143	-0.326286	0.571133	0.646117	0.80164	0.641558	0.430977	0.287249	0.684084	0.645217	0.842154	0.868126	0.364185	0.236811	0.225631	0.423183	0.220355	0.831848	-0.0512092	0.217408	0.0959964
170	-0.151048	0.0716882	-0.2252	-0.224547	-0.249201	-0.0646257	-0.262108	-0.124179	-0.234533	-0.0898718	-0.144846	-0.170984	0.0224879	0.0402883	-0.222197	-0.132383	-0.458341	-0.464655	-0.0169804	0.00407201	-0.089074	-0.134862	0.0802578	-0.0193818	-0.0997456	-0.10238		-0.0922456	-0.241107	-0.38575	0.470095	0.705812	0.798563	0.604713	0.450191	0.287005	0.68797	0.644214	1.00934	0.88132	0.152744	0.0601289	0.0492353	0.22803	0.164131	0.711345	0.124735	0.42275	0.166004
180	-0.0913217	-0.0873004	-0.0799445	-0.218048	-0.230462	-0.111421	-0.236451	-0.0932682	-0.208143	-0.157172	-0.171135	-0.194873	0.0197275	0.0577122	-0.231918	-0.160193	-0.459214	-0.465397	-0.0176575	-0.0392042	-0.133807	-0.171268	0.0826668	-0.0063187	-0.143092	-0.0888691		-0.221066	-0.120506	-0.32762	0.60551	0.654039	1.07251	0.674139	0.514937	0.251931	0.743238	0.794956	1.08093	0.984891	0.144487	0.0988296	0.0659753	0.385016	0.232126	0.807957	0.252044	0.382026	0.111731
190	-0.234676	0.0396068	-0.101881	-0.206311	-0.198861	-0.118094	-0.279585	-0.126698	-0.245875	-0.127904	-0.0251502	-0.238977	0.0404708	-0.0917552	-0.216895	-0.159166	-0.480337	-0.451435	-0.0146297	-0.0468339	-0.150283	-0.179231	0.0938856	-0.0106275	-0.210381	-0.116671		-0.0748867	-0.247676	-0.380015	0.581617	0.70689	1.09952	0.657275	0.450952	0.280344	0.691123	0.863539	1.10896	1.01286	0.34702	0.257012	0.160149	0.367131	0.211885	0.886852	0.314898	0.408052	0.0721436
200	-0.0938875	0.102519	-0.0331914	-0.28369	-0.249201	-0.164844	-0.273506	-0.0896046	-0.252372	-0.137081	-0.0103855	-0.0466018	0.0175574	-0.0378042	-0.159793	-0.161378	-0.508093	-0.478441	-0.0375921	-0.0151098	-0.11174	-0.17353	0.0717997	-0.0122917	-0.176356	-0.162211		-0.123812	-0.313775	-0.452493	0.546881	0.734429	0.953067	0.644815	0.551557	0.230951	0.625543	0.907107	1.08429	1.06831	0.323047	0.201737	0.119946	0.438498	0.13546	0.805595	0.289239	0.397547	0.225112
210	-0.159502	-0.0793199	-0.211648	-0.240718	-0.269942	-0.19028	-0.310249	-0.094642	-0.196174	-0.0744109	-0.0215154	-0.0535957	0.073006	-0.0035862	-0.131311	-0.116978	-0.567185	-0.534715	-0.029449	-0.0632064	-0.158413	-0.187034	0.0834406	-0.0243745	-0.226574	-0.158801		-0.154049	-0.270199	-0.217684	0.628569	0.698572	1.06525	0.721578	0.520861	0.213506	0.912095	0.831096	1.02766	0.984732	0.335338	0.137153	0.0677776	0.428824	0.270304	0.622477	0.293335	0.426693	0.383507
220	-0.21429	-0.122725	-0.0279275	-0.237141	-0.357633	-0.247016	-0.388919	-0.0296138	-0.246502	-0.170484	-0.0525241	-0.0895018	-0.0008563	-0.0369645	-0.213088	-0.147552	-0.599713	-0.551894	-0.0294772	-0.0539878	-0.15206	-0.20382	0.102871	-0.017102	-0.212735	-0.217924		-0.1818	-0.276184	-0.172985	0.62377	0.712782	1.16314	0.757241	0.34824	0.213242	0.678988	0.836593	1.04954	1.22098	0.280759	0.0750138	0.0533594	0.306042	0.273077	0.850507	0.385709	0.389911	0.396596
230	-0.415191	0.0686645	-0.0422262	-0.26233	-0.381397	-0.243031	-0.391422	-0.138948	-0.291985	-0.182555	-0.108018	-0.299258	-0.0332638	-0.0019068	-0.200716	-0.174097	-0.64481	-0.576885	-0.0364919	-9.595e-05	-0.168545	-0.168418	0.0964354	-0.0177404	-0.265307	-0.182831		-0.231798	-0.211271	-0.120361	0.613171	0.760872	1.29679	0.836101	0.497367	0.27022	0.950713	0.930544	1.13131	1.25246	0.238755	0.043515	-0.0057262	0.379519	0.159183	0.918428	0.197853	0.421328	0.268302
240	-0.181624	0.0927123	-0.111203	-0.222834	-0.39707	-0.219566	-0.332777	-0.0992215	-0.136612	-0.0400992	-0.0898303	-0.244402	-0.0366626	0.0272729	-0.216623	-0.155848	-0.654091	-0.616581	-0.0977813	-0.0132139	-0.149015	-0.0356466	0.0717997	-0.100405	-0.271322	-0.212864		-0.140983	-0.190944	-0.0774346	0.632418	0.669362	1.22342	0.786391	0.502242	0.265955	0.785521	0.870466	1.06763	1.11463	0.224447	0.0335961	-0.05921	0.364275	0.244027	1.07182	0.239662	0.603289	0.436412
[truncated: 2 more columns]

## Sheet: F
	AHL												CCHa1 1 uM
0	0.113569	0.0507285	0.0399919	-0.0105423	-0.0837982	0.00247696	-0.0366869	0.085657	0.0822579	-0.0416059	-0.069361		0.0117023	-0.0397023	-0.0275408	-0.0536587	0.0208573	0.0104284	-0.0351304	-0.0019996	0.0379259	0.0257493	0.0362926	-0.0522949	-0.0350467	-0.0408421
10	0.0135548	0.0253444	-0.0292291	0.0188891	0.0274503	0.00914594	0.0155556	0.0194797	-0.0050635	-0.0194208	-0.0229698		0.00571897	-0.0262888	-0.0310052	-0.0391408	0.013071	-0.0120024	1.2598e-05	0.00303548	0.030836	0.00157444	0.0344412	0.0176905	-0.0656223	0.0178431
20	0.0523778	0.0105282	-0.0344509	0.0115467	0.02889	0.0283251	-0.0190025	0.0717184	-0.000281	0.0292464	-0.0102485		0.00458101	-0.013176	-0.0096826	0.0328299	0.0133687	0.0195633	0.0200432	-0.0319647	-0.0309431	-0.010513	-0.0277855	-0.0078386	0.0462507	0.0223744
30	-0.0797151	-0.0469826	-0.0160996	-0.0174734	0.0163358	0.0114034	-0.0012702	-0.0207431	0.0270405	0.00019261	-0.0132369		0.00554905	0.02576	-0.0285169	0.0238123	-0.0019621	-0.007228	0.0211468	0.0154777	-0.0310616	0.00745865	-0.008195	0.0254985	0.0449228	-0.009442
40	-0.0668461	-0.0453872	0.0243689	0.0246067	0.00990897	-0.0321942	0.0264937	-0.0561457	-0.0302622	-0.005667	-0.0173167		-0.0146047	0.0317359	0.0481717	0.047635	-0.0262885	0.0116695	-0.0019375	-0.0114709	0.00355908	-0.0261452	-0.0260955	0.00305573	0.0197481	0.0216518
50	-0.0329407	0.00576871	0.0154187	-0.0270267	0.00121319	-0.0191572	0.0149103	-0.0999664	-0.0736918	0.0372546	0.133133		-0.0129466	0.0216712	0.0485739	-0.0114777	-0.0190464	-0.0224307	-0.0041346	0.026922	-0.0103163	0.00187574	-0.0086578	0.0138888	-0.0102526	-0.0115852
60	0.0230656	-0.0239342	0.0226409	-0.0441693	-0.0427149	-0.0012902	0.0114385	-0.140958	-0.150624	0.0525139	0.0827221		-0.02083	0.0263336	0.0121334	-0.0044071	-0.014223	-0.0326926	-0.0122728	0.00118226	0.0305991	0.0139632	0.0176494	0.106828	-0.0560917	-0.112423
70	-0.0145508	-0.047247	0.0491488	-0.123208	-0.258347	0.0166097	-0.0049606	-0.140944	-0.196014	0.0474926	0.0677275		0.00029178	0.0248812	0.0232452	-0.0079334	0.03843	0.00922527	0.00789382	-0.0471611	0.0230692	0.174592	-0.0514447	0.137835	-0.102951	-0.0615264
80	-0.0092917	0.00239298	0.0588315	-0.0110051	0.0700078	0.00760332	-0.0006889	-0.163466	-0.183265	0.0285221	0.0941185		-0.0764664	-0.0466634	-0.0904576	0.0164546	-0.0503404	-0.0306098	-0.0240543	-0.0316339	-0.022398	-0.0074114	0.041061	0.232879	-0.34426	-0.12816
90	-0.0599592	-0.0474585	0.028412	-0.0354798	0.0581101	0.0318666	0.0439967	-0.214318	-0.225596	0.0233543	0.0697449		-0.134353	-0.0650676	-0.12671	0.0168225	-0.0619594	-0.0286506	-0.0378314	0.0279997	-0.0255453	0.197171	0.132049	-0.0068984	-0.344851	-0.181799
100	-0.0879453	-0.0195757	0.0292573	-0.0495579	-0.0731905	0.00567506	-0.0189172	-0.167242	-0.274058	0.0733643	-0.0055815		-0.0790513	-0.0570519	-0.0021854	0.10315	-0.0094088	-0.0120642	0.00042077	-0.0329854	-0.0119407	0.0524941	0.0873462	0.1046	-0.312656	-0.270427
110	0.0161217	0.0144857	0.0580473	-0.0945688	-0.108711	0.0271588	-0.0489102	-0.250283	-0.239956	0.0259341	0.0500156		-0.130337	-0.0301741	0.0431413	0.0461186	0.0415417	-0.0162536	0.00094484	-0.0085058	-0.0068982	0.101641	0.0419868	-0.204407	-0.438173	-0.343539
120	0.0096332	0.0172532	0.0654902	-0.145338	-0.110484	0.0034505	-0.0123149	-0.385481	-0.369421	0.0453766	0.0636477		-0.134636	-0.0479724	0.00136484	0.107672	-0.0210325	0.039721	-0.0111642	0.0530324	-0.0967494	-0.0660586	0.0168421	-0.163405	-0.430481	-0.268811
130	-0.0003443	-0.0193774	0.0543376	0.0241234	0.0225207	0.0379523	-0.0304526	-0.298196	-0.361092	0.0440256	0.0180619		-0.128982	-0.0374405	-0.0678104	0.0830506	0.0175921	0.0316417	-0.0075713	0.0299043	-0.149476	-0.108276	0.0614911	-0.325532	-0.476733	-0.358773
140	-0.0489059	0.0185709	0.0481063	-0.0423594	0.0281413	0.0391987	-0.0182239	-0.308001	-0.365188	0.0432281	0.100773		-0.0978508	-0.0476903	-0.0100258	0.054544	0.0265924	0.0333869	-0.0118445	-0.0111231	-0.146244	0.00189346	0.0185858	-0.104784	-0.391452	-0.369293
150	0.0250862	-0.0045127	0.0417716	-0.0985279	-0.0469419	0.0262511	-0.0054459	-0.369784	-0.399814	0.0134825	0.0937873		-0.0866308	-0.027954	-0.0318687	0.0346334	0.00693589	0.0302484	0.00693638	0.0377448	-0.200239	-0.18034	0.0412978	-0.23337	-0.565456	-0.448993
160	-0.0633571	-0.0457927	0.0594983	-0.173597	-0.0286174	-0.0057487	-0.0157707	-0.478217	-0.428284	0.0654295	0.08215		-0.0951886	-0.0123481	-0.0199792	0.00943787	0.0251365	0.0421462	-0.0293152	0.0304175	-0.310582	-0.17006	-0.0994413	-0.355211	-0.620323	-0.477822
170	0.0232648	0.00383846	0.0474019	-0.21067	-0.154067	0.00639933	0.0183341	-0.425552	-0.431393	-0.0830218	0.118763		-0.113957	-0.0979861	-0.0366148	0.0295997	0.0150711	0.00271527	-0.0628406	-0.074218	-0.236755	-0.150245	-0.0498947	-0.284264	-0.491681	-0.465391
180	0.0392983	0.0209903	0.1108	-0.315078	-0.14544	0.0537124	0.0251284	-0.459719	-0.568625	-0.115819	0.0176103		-0.139214	-0.12177	0.00268946	-0.01303	0.0218248	0.0627889	-0.075252	-0.0798803	-0.332512	-0.222256	-0.0951035	-0.494548	-0.465453	-0.375857
190	0.0485473	0.0119032	0.0766569	-0.286418	-0.127461	0.0310059	0.0390423	-0.408071	-0.536546	-0.138061	-0.0303541		-0.136088	-0.131497	-0.0270743	0.0142293	0.0308344	0.0638113	-0.0781596	-0.0502745	-0.353409	-0.286663	-0.108246	-0.505953	-0.424448	-0.350446
200	0.00064032	0.024181	0.0622407	-0.0862186	-0.153871	0.00141876	0.00861731	-0.509637	-0.581774	-0.164722	0.0290519		-0.127139	-0.126469	-0.0022283	-0.0384947	0.0267505	0.07637	-0.0305649	-0.0078843	-0.390077	-0.39148	-0.138827	-0.353064	-0.424359	-0.313412
210	0.0485644	0.0317169	0.0882602	-0.072089	-0.159054	0.0253152	0.0417195	-0.514375	-0.588667	-0.0078481	0.0354953		-0.0794477	-0.121848	0.0163432	-0.0598679	0.0126012	0.0202718	-0.0079089	0.0443936	-0.407929	-0.434336	-0.169213	-0.286288	-0.41244	-0.332872
220	0.0659639	0.0180421	0.124188	-0.0340709	-0.0515489	0.0563367	0.0577986	-0.496069	-0.582473	0.0569819	0.0906935		-0.10317	-0.121765	0.0150347	-0.0501055	0.0050428	0.0412379	0.0228701	0.0553361	-0.414173	-0.476872	-0.17592	-0.233615	-0.389905	-0.307779
230	0.00081107	0.0413372	0.0928809	-0.0453314	-0.0112604	0.0383568	0.052007	-0.554776	-0.581974	0.0419911	0.104431		-0.105662	-0.134892	0.00666332	-0.0827933	0.0326716	0.00746581	0.0521727	0.0733494	-0.406982	-0.509732	-0.136653	-0.0623716	-0.39065	-0.300847
240	0.0136288	0.0231189	0.12308	-0.0834729	0.0524204	0.0289412	0.0548068	-0.540892	-0.548496	0.0056697	0.111793		-0.100477	-0.123962	0.0175821	-0.049289	0.0314576	-0.0020495	0.0287861	0.0696886	-0.427169	-0.488322	-0.189988	-0.171519	-0.374447	-0.261928

## Sheet: G
Time	AHL																		CCHa1 1 uM
0	0.346238	0.366836	0.0243246	0.038499	0.0650172	0.120069	0.063858	0.00786078	-0.106166	0.0593267	0.029614	0.0343356	0.0471834	-0.0228944	0.0370331	-0.0759823	0.0539922		0.189742	0.18191	-0.0235299	-0.0568967	0.0539568	0.0551353	0.0531959	0.0168988	-0.0231285	0.0156703	0.0932524	0.0432781	0.158332	0.108254	0.105524	0.0840458	0.0318703	0.0114656	-0.0171998	0.0130531
10	0.00146088	0.0471297	-0.030069	-0.0094155	0.0335734	0.0235888	0.0352875	-0.0071402	0.0289496	0.0448622	0.0419606	0.00610584	-0.0108567	0.0126521	0.0268674	0.00801142	0.0268597		0.0270743	-0.0063625	0.00019548	-2.749e-05	-0.0078674	0.00020365	0.0203093	0.0146728	-0.0096075	0.00793597	0.0149882	0.012921	0.0568361	0.107831	0.0393902	0.0241123	-0.0092806	-0.059351	0.00807502	0.0746545
20	0.0505625	0.0233532	-0.001814	-0.0303931	-0.0203684	-0.0227435	-0.0334874	0.00065506	0.0350706	0.0340626	0.0213075	-0.0112778	0.0214489	0.0237433	0.0123607	0.026935	0.00629692		-0.0178459	0.0516438	0.00654009	0.0396336	-0.0166164	-0.0350901	0.00308349	0.00848806	-0.0041627	-0.0004079	-0.0054376	-0.0072784	-0.0045668	-0.0392259	0.0871284	0.0310862	-0.0281581	-0.0120057	0.00407584	-0.0781275
30	0.0249972	-0.0149879	-0.0038754	0.0171129	0.0180507	-0.0465822	0.0240147	0.0145097	0.0174964	-0.149379	-0.0497984	-0.041906	-0.0411075	-0.0052163	-0.001412	0.00662478	-0.0413509		-0.0631652	-0.0152246	0.0169297	-0.006218	0.0127722	0.00650961	-0.0067466	-0.0078459	0.0180432	-0.0136088	-0.0201416	-0.0163793	-0.0701025	-0.0337461	-0.0485122	-0.0127231	0.00560166	0.0341021	0.00907482	-0.0449281
40	-0.042619	-0.0177577	0.00907017	-0.0203488	-0.0480479	-0.0447298	-0.0788699	0.0110815	0.100328	0.0234139	0.0067793	0.0137045	-0.0196654	-0.0391741	-0.0176017	0.0146438	-0.0220689		-0.0481326	-0.0846029	-0.009677	0.021183	-0.010813	-0.0179178	-0.0291308	-0.0183828	0.0148558	-0.006054	-0.0338039	-0.0188789	-0.0310136	-0.111484	-0.0882755	-0.0976738	0.00794886	0.0286419	0.0211724	0.070122
50	-0.0344016	-0.0377374	0.00236374	0.00454555	-0.048225	-0.0296018	-0.010803	-0.0269668	-0.075678	-0.012286	-0.049863	-0.0009622	0.00299728	0.0308895	-0.0572474	0.0197673	-0.0237291		-0.0876724	-0.127364	0.00954155	0.00232557	-0.0314323	-0.0088407	-0.0407113	-0.0138309	0.00399974	-0.0035357	-0.0488575	-0.0136625	-0.109486	-0.0316289	-0.0952552	-0.0288474	-0.0079822	-0.0028529	-0.0251982	-0.034774
60	-0.0334886	-0.0869086	-0.0036006	-0.0094635	-0.0215863	-0.0163924	-0.0235196	-0.0233312	-0.0552404	-0.0959495	0.0411041	0.012049	-0.02823	-0.0308319	-0.0743231	0.0548819	-0.0950467		-0.0242018	-0.16746	-0.0120874	0.0334211	0.0244196	0.036992	-0.0462407	-0.0203798	-0.034924	-0.0275467	-0.0356803	-0.0189754	-0.075577	-0.0753424	-0.12826	-0.0864407	-0.0732544	0.0324523	-0.035976	0.166512
70	-0.0231914	-0.143176	0.0195696	-0.0392839	0.0502474	0.0386727	-0.0235335	-0.0496539	-0.0036424	-0.0284365	-0.0533052	-0.0270907	-0.0243037	-0.0584706	-0.0805148	0.0433147	-0.0903981		-0.0684273	-0.103597	-0.0308904	0.0243497	0.00126675	0.0255039	-0.122968	-0.0032059	-0.0667542	0.00538462	-0.0334543	-0.0068248	-0.101055	-0.0434851	-0.0773154	-0.130039	-0.0410428	0.0959426	-0.050593	-0.0736244
80	-0.116221	-0.137387	0.0158591	-0.0537255	0.0555398	0.0954138	0.00600889	0.0884665	-0.040135	-0.0609329	-0.061741	-0.0081576	-0.075305	0.0214762	-0.12696	0.0188496	-0.089568		-0.0980489	-0.22652	-0.0138975	0.0248445	0.00236798	0.0583319	-0.039981	-0.0102716	-0.0230087	-0.0369773	-0.02749	-0.0196124	-0.0653814	-0.279837	-0.108772	-0.153699	-0.0191688	0.0316666	-0.0156801	-0.389637
90	-0.0993294	-0.122387	0.0589286	-0.0199644	0.0271738	0.0470527	-0.019452	0.0187349	-0.0440793	-0.108568	-0.157281	0.00135135	-0.0502824	0.0168053	-0.139286	0.0250437	-0.12493		-0.0645546	-0.346096	0.00587515	0.0440209	-0.0189405	0.0813629	-0.0857464	-0.02176	-0.0591382	-0.0208754	-0.0476232	-0.0184349	-0.135861	-0.310698	-0.202424	-0.205723	-0.114755	0.0299873	-0.0238585	-0.140994
100	-0.105924	-0.147719	0.0626941	-0.0071567	0.0087504	0.00094091	-0.0289477	0.0126646	-0.0637719	-0.141003	0.0215984	-0.0571459	-0.0732299	-0.0589347	-0.0582645	0.0228209	-0.0943351		-0.0779612	-0.216419	-0.0264759	0.0729943	-0.0905541	0.0410506	-0.0508775	-0.0430805	0.0477021	-0.0334763	-0.0491215	-0.0538829	-0.125522	-0.174302	-0.168134	-0.243681	-0.108113	0.00723289	-0.0602711	-0.249805
110	-0.0716844	-0.192907	0.0909766	-0.0138849	-0.0005499	-0.0066452	-0.0379298	0.00636505	0.0437336	-0.104974	0.00028281	-0.0618579	-0.084663	-0.0420302	0.00018699	-0.0285052	-0.145493		-0.0412002	-0.107099	-0.0509124	0.0403593	-0.0188864	0.0541316	-0.0571025	-0.0808054	0.0216092	-0.0488695	-0.0703249	-0.0062217	-0.151767	-0.261081	-0.229845	-0.287374	-0.120848	-0.0189194	-0.123438	-0.179521
120	-0.0817279	-0.26072	0.0960614	0.00514628	-0.0013249	-0.0059174	0.0331218	0.0577767	-0.119343	-0.254057	0.00871856	-0.068459	-0.0377508	-0.138221	-0.0142987	-0.0455986	-0.122203		-0.206632	-0.0190049	-0.0828663	0.0280992	-0.0198728	0.0943457	-0.0514108	0.00503449	-0.0122485	-0.0440502	-0.063376	-0.0277336	-0.0873079	-0.48184	-0.218761	-0.302211	-0.120798	-0.0564833	-0.0562319	-0.180198
130	-0.146351	-0.280388	0.0888052	-0.0039368	-0.0121088	0.0190019	0.00946568	0.0164312	-0.125391	-0.207983	-0.0045976	-0.0417999	-0.0368354	-0.107036	-0.0428351	-0.039583	-0.130907		-0.225936	-0.200864	-0.0528979	-0.0206552	0.00361108	0.0736277	-0.0700508	-0.0180186	-0.0348282	-0.020162	-0.0447195	-0.0211469	-0.143681	-0.444603	-0.252097	-0.336495	-0.430129	-0.0663923	-0.126698	-0.28218
140	-0.109069	-0.292681	0.146305	0.0194437	0.00246163	0.0120113	0.011437	-0.0150665	-0.0908856	-0.261165	-0.052675	-0.0491015	-0.0651739	-0.104936	-0.115253	-0.0640582	-0.137073		-0.320536	-0.231509	-0.0316199	-0.101737	0.00743498	0.0383885	-0.0657153	-0.0327198	0.015014	-0.0541045	-0.0731073	-0.028028	-0.135939	-0.461739	-0.27294	-0.315269	-0.249444	-0.102552	-0.216299	-0.354731
150	-0.101612	-0.278925	0.0712146	0.0613749	0.0328869	0.0114599	0.0140747	-0.0041487	-0.085495	-0.249344	0.0808749	-0.0716216	-0.0888945	-0.0434523	-0.09715	-0.0919236	-0.137382		-0.258159	-0.258343	-0.0775653	0.00706467	0.0185689	0.0451963	-0.107957	0.00340168	0.0204013	-0.0544352	-0.0911216	-0.0261026	-0.199272	-0.503136	-0.414993	-0.519642	-0.310771	-0.123421	-0.255511	-0.233088
160	-0.107243	-0.348854	0.0880631	0.00658804	-0.0154304	0.0126287	0.0582633	-0.0047711	-0.0492362	-0.0892319	-0.001511	-0.0501415	-0.0752236	-0.0361038	-0.133399	-0.0747384	-0.129697		-0.22907	-0.28431	-0.0533505	0.0210731	0.00971851	0.0601757	-0.0879141	0.00296705	-0.0155077	-0.0663935	-0.0960871	-0.0289352	-0.144298	-0.537484	-0.424226	-0.591511	-0.394022	-0.119591	-0.229917	-0.355672
170	-0.180996	-0.393638	0.162878	0.00550672	-0.0001735	0.0339535	-0.0080543	0.00517501	-0.0382797	-0.418242	0.0322966	-0.0817886	-0.108363	-0.0155042	-0.146526	-0.136464	-0.144331		-0.302045	-0.303955	-0.0612374	0.0297596	0.0222239	0.0495167	-0.135523	-0.0052381	-0.0142088	-0.0667903	-0.109286	-0.0396912	-0.201023	-0.508267	-0.421503	-0.525727	-0.425884	-0.0037564	-0.267229	-0.392639
180	-0.182062	-0.406242	0.146772	0.0247542	-0.0009042	-0.0046825	-0.0314188	-0.0393476	-0.0662554	-0.336824	0.103483	-0.0714518	-0.141645	-0.0900007	-0.170397	-0.0316914	-0.142671		-0.159923	-0.338195	-0.0882782	0.0451644	0.0236629	0.0592702	-0.0922496	-0.0267759	-0.0411405	-0.0352339	-0.110384	-0.0479862	-0.155778	-0.52376	-0.464735	-0.51536	-0.385133	-0.135618	-0.241654	-0.515342
190	-0.186373	-0.379633	0.157161	0.0140371	-0.0890799	-0.064114	0.0506556	-0.0135489	-0.0559562	-0.302127	0.012888	-0.0658908	-0.162843	0.0445214	-0.0486598	-0.0254413	-0.189441		-0.146797	-0.316938	-0.0609788	0.086013	0.0167447	0.0633833	-0.102845	-0.0236043	-0.0449174	-0.0626987	-0.113887	-0.0187389	-0.202343	-0.55771	-0.500421	-0.544777	-0.36181	-0.20232	-0.192004	-0.540212
200	-0.117793	-0.362766	0.12635	0.0480867	-0.0334995	-0.0435831	-0.0611278	-0.0466734	-0.0691479	-0.184804	-0.0764146	-0.0869039	-0.134322	0.0628182	-0.0475483	-0.0302843	-0.148434		-0.10544	-0.286045	-0.0564905	0.0357082	-0.0038881	0.0482948	-0.110936	-0.0089384	0.0106955	-0.0691811	-0.116741	-0.0319897	-0.226889	-0.626206	-0.518734	-0.642903	-0.376143	-0.188757	-0.244014	-0.537327
210	-0.164257	-0.405183	0.171729	0.0390997	-0.0785396	-0.0921868	0.0176287	-0.0341725	-0.0887381	-0.090208	-0.0161039	-0.135022	-0.162579	0.0989835	-0.0639319	-0.08159	-0.146608		-0.105942	-0.283504	-0.0716178	0.0728183	-0.0150017	0.0218708	-0.0959474	-0.0071528	-0.003669	-0.0614656	-0.151193	-0.0544282	-0.296866	-0.635298	-0.528769	-0.583742	-0.365156	-0.197331	-0.249373	-0.653761
220	-0.196518	-0.405993	0.149163	-0.0151345	-0.0856255	-0.0693404	-0.0226172	-0.0284735	-0.0656856	-0.192826	-0.0634863	-0.139543	-0.146589	0.018763	-0.135585	-0.117898	-0.14426		-0.0924172	-0.312786	-0.0644143	-0.0098026	-0.0387153	0.0207253	-0.106821	-0.0151054	-0.0126127	-0.0676077	-0.158991	-0.0499936	-0.300711	-0.620004	-0.535196	-0.626147	-0.43762	-0.207584	-0.242354	-0.582918
230	-0.228374	-0.382123	0.0791304	0.0130759	-0.0378618	-0.0924735	-0.0233946	-0.0652008	-0.0094275	-0.209181	-0.0805679	-0.160408	-0.188822	0.0638238	-0.0950739	-0.0592356	-0.15932		-0.132489	-0.467439	-0.0862279	0.011199	-0.0446876	-0.0108154	-0.106554	-0.0071587	-0.036755	-0.0628358	-0.154418	-0.0515088	-0.362121	-0.68489	-0.626664	-0.717861	-0.400415	-0.218975	-0.253612	-0.54545
240	-0.213815	-0.410723	0.175851	-0.0092713	-0.0015685	-0.142643	-0.039804	-0.0044981	-0.0220348	-0.128819	-0.0144878	-0.184116	-0.190592	0.0441108	-0.151287	-0.112693	-0.138449		-0.168068	-0.681027	-0.114174	-0.0304083	-0.0419244	0.00703329	-0.0970834	0.00440604	-0.0474864	-0.0592119	-0.163386	-0.079815	-0.360679	-0.691415	-0.626221	-0.698835	-0.459045	-0.215312	-0.26203	-0.545274
