# Supplementary material for: Energetic demands regulate sleep-wake rhythm circuit development
Source: eLife. 2024 Jul 22;13:RP97256. doi: 10.7554/eLife.97256 (PMC11262794; doi:10.7554/eLife.97256)
Supplement: Figure 5—figure supplement 1—source data 1. [file elife-97256-fig5-figsupp1-data1.xlsx]

## Sheet: A
Dh44>mCherry Ct1	Dh44>mCherry Ct13	iso>Glut1 RNAi CT1	iso>Glut1 RNAi CT13	Dh44>Glut1 RNAi CT1	Dh44>Glut1 RNAi CT13
40	58	40	42	14	68
41	60	29		51	32
48	40		40	12	61
36	74	47	44	48	32
	49	90	29	16	60
42	52	42	50	42	23
	32	46	90	70	77
30	45	36	77	46	48
42	69	77	47	31	76
49		57		16
46	47	46	44	37	47
29	36	52	45	20	73
36	47	25	45	34	43
51	35	34	46	25	41
42	30	40	45	36	55
54	70	20	46	53	34
31	30	29	57	63	44
23	35	56	57	32	24
42	31	51	41	56	45
46		51		43
17	51	50	45	32
41	33	28	50	11
38	41		52	24	33
28	47	23	45	37
37	61	27	25	44	57
25	38	22	39	61	57
30	21	34	27	32
33	49	41	58	28	59
17	47	37	53	44	62
		19		66
36	58	5		30	27
31	44	52	33	35	47
33	46	36	47	64	43
	29	26	33	57	43
51	46	41	75	66	49
52	40	20		41	46
41	106	25	43	33	37
59	42	44	61	51	41
41	64		63	25	42
37		65		49

## Sheet: B
Dh44>mCherry Ct1	Dh44>mCherry Ct13	iso>Glut1 RNAi CT1	iso>Glut1 RNAi CT13	Dh44>Glut1 RNAi CT1	Dh44>Glut1 RNAi CT13
47.55	28.14	21.45	33.57	18.86	39.26
55.02	36.4	55.03		41.41	59.06
12.25	65.55		56.55	36	32.26
53.67	28.05	17.11	54.55	39.38	71.25
	47.02	16.53	49.86	13.88	31
32.14	43.38	44.14	34.92	20.14	37.57
	99.94	45.91	25.33	23.83	24.86
72.8	65.6	21	28.36	26.87	40.38
33.57	16.96	20.34	18.89	19.16	32.53
18.98		16.95		33
27.78	52.98	19.96	30.41	17.84	47.87
34.97	71.67	34.73	52.13	103.2	25.32
47.17	53.36	28.32	40.27	53.82	50.51
29.65	56.4	48.35	37.57	70.56	51.22
26.29	65	10.95	54.4	56	22.36
22.67	24.17	20.7	26.35	20.26	35.29
20.9	67.8	25.03	21.26	38.95	57.68
26.87	48.51	32.79	41.05	50.25	92.75
24.43	67.55	25.29	45.95	32.68	42.93
24.52		44		31.26
25.06	36.12	26.28	19.73	43.5
46.98	64	21	26.52	6.55
39.95	23.85		36	24.75	21.09
24.64	37.02	49.04	30.13	48.97
24	42.3	48.22	45.84	55.36	30.21
33.12	54.47	17.18	43.69	33.84	13.89
49.4	94.29	44.47	25.56	88.88
26.18	47.88	26.78	27.83	67.5	17.39
17.29	36.89	43.46	20.6	49.09	23.61
		22.11		18.82
18.33	40.97	12		32	49.11
58.26	43.09	34.96	30.18	45.43	19.4
33.45	60.13	33	35.49	35.91	54.42
	32.48	44.77	70.73	29.47	49.12
32.35	21.65	29.85	13.84	16.55	33.06
40.04	57.6	16.2		40.98	42.65
42.29	17.94	28.08	39.77	27.64	50.59
42.2	54.57	34.36	28.03	49.41	50.05
48.88	39.47		18.95	33.84	41
55.95		31.29		49.59

## Sheet: C
dh44>mCherry ct0	dh44>mCherry ct12	iso>Hex-C CT0	iso>Hex-C CT12	Dh44>Hex-C CT0	Dh44>Hex-C CT12
	44	19	31	12	42
10	30	7	42	29	35
36	72	16	65	66	26
	43	17	73	27	29
48	26	46	54		49
30	46	43	20	33	51
28	44	30	64	35	47
35	42		36	35	44
37	50	59	37	40	62
32		6		22
72	43	23	47	42	26
18	29		35	37	69
18	45		42		26
	46	1	30	34	12
22	12	13	54	51	39
51	2	7	77	34	25
36	55	21	73	41	36
	68	35	53	34	34
27	38	11	74	39	26
20		20		30
23	37	28	62	24	38
36	32	40	41	48	9
4	38	37	18	52	31
23	52	28	30	38	38
11	6	9	24	52	7
32	53	11	33	36	19
47	36	33	54	11	9
	29	28	12	40	63
12	42	9	39	35
		16		43
26	48	15	35	56	18
31	46		51	85	44
46	58	12	22	40	33
	48	24	31	69	54
84	55	36	20	72	37
	32	37	18	62	21
41	59	44	36		41
36	67	54		59	40
45	53	7			45
78		36		47

## Sheet: D
dh44>mCherry ct0	dh44>mCherry ct12	iso>Hex-C CT0	iso>Hex-C CT12	Dh44>Hex-C CT0	Dh44>Hex-C CT12
	41.05	42	21.87	19.5	53.57
49.2	107.2	18.86	29.43	49.24	84.17
43	38	13.5	21.23	33.73	44.54
	50.37	23.29	23.51	31.78	66
21	85.15	27	38.56		51.18
12.6	18.13	49.4	18.3	20.18	28.12
36	42.68	24.8	26.06	61.37	54.89
46.46	42.71		91.67	60.34	53.18
44.11	25.32	17.8	42.81	53.25	10.84
60.19		14		58.36
18.5	37.95	18	31.02	14.43	58.38
18	63.31		53.83	60.97	15.83
23.33	44.13		41.57		7.85
	34.96	6	37	20.47	17.5
9.82	9	20.31	30.56	18.94	31.08
21.18	9	6	28.99	36.71	20.88
32.17	36.76	29.43	24.25	19.9	12.5
	26.21	38.74	29.09	35.47	12.88
19.11	57.63	19.64	23.19	19.23	12
9.9				25
13.57	36.16	35.79	11.03	12.25	33.16
17.33	80.44	18.9	20.93	27.38	11.33
9	53.37	27.41	18.67	22.15	68.32
31.57	43.27	29.57	37	56.21	40.26
8.73	13	9.33	21.25	22.27	6.86
15.19	31.47	17.45	18.91	23.33	24.63
29.23	51	33.45	25.11	14.18	8
	17.17	19.07	19.5	27.3	19.43
11	52.57	30.67	24.62	19.71
		10.13		46.33
16.85	54.25	9.2	12.51	10.82	9
18	31.43		19.53	20.19	41.59
17.61	39.1	21	30.27	55.35	44.36
	48.75	18.5	30.19	31.39	19.11
15.29	42.65	13.5	16.5	19.33	64.7
	24.19	24.65	10.33	31.16	8.57
15.37	43.53	39	27.33		16.98
21.83	36.27	23.22		35.08	41.55
23.07	27.85	9.43			14.4
27.46		19.17		30.89

## Sheet: E
Dh44>mCherry CT1	Dh44>mCherry CT13	iso>Pyk CT1	iso>Pyk CT13	Dh44>Pyk CT1	Dh44>Pyk CT13
37	65	29	37	39	35
33	39	29	34
51	37	35	63	38	28
34	50	66	46
35	69	30	26	34
80	30	14	24	41	27
37		47	58	33	53
79	40	38		38
	65	13	30	48	8
68		26
42	38		47	19	36
27	39	43	64	48	0
44	34	29	44	36	65
50	38	28	42	31	29
21	19	42	28	68	11
	37		45	26	9
52	39	30	40	36	34
33	41	19	37	31	34
38	42	40	19	53	47
51		14		58
56	43	49	6	56	24
56	54	18	43	40	18
	53	28	21	27	31
54	48	28	37		23
46	42	44	20	69	44
41	55	31	49	2	30
43	82	13	53	26	32
33	29
82	65			15
65		50	19	40	28
10	64	25	51	32	42
52	66	82	39	63	63
48	48	46	29	35	28
0	60	56	46	42	34
20	55	61	35	26
35	44		36	74	42
	50				29
	18			27	53
37				37

## Sheet: F
Dh44>mCherry CT1	Dh44>mCherry CT13	iso>Pyk CT1	iso>Pyk CT13	Dh44>Pyk CT1	Dh44>Pyk CT13
19.46	38.86	56.48	41.68	30.62	65.49
37.27	72.31	42.62	75
38.47	62.11	22.46	36	44.37	21.64
63.18	52.56	24.82	46.96
39.09	31.48	42.4	22.15	58.41
20.33	91.8	27.86	21.75	15.07	17.78
33.89		43.66	41.9	46.73	29.55
28.48	41.4	33.16		26.05
	16.43	30	23.2	30.63	9
32.82		21.69
33.86	76.74		53.49	24.32	51.17
52.44	58	17.02	39.47	40.13	0
39	56.82	45.31	51.95	41.17	27.69
21	54.79	53.79	35.86	55.35	45.93
21.43		41.86	16.29	23.03	19.09
	55.14		22.27	33.23	118.67
28.5	56.46	47.8	30.15	54	33.88
60.55	45.07	16.11	61.62	49.74	54.35
16.89	65.14	46.05	23.68	45.4	39.32
39.41		19.71		31.97
31.71	31.67	19.96	12	33.11	32.5
28.61	47.22	15.33	48.98	27.15	18
	46.42	40.71		17.56	31.94
31.44	46.88	13.93	44.11		67.3
21.91	51.71	33.41	49.8	25.83	29.86
46.98	36.87	29.03	33.43	6	33.6
33.49	17.2	13.85	26.72	39.69	46.5
46.36	62.9
14.41	34.06			34.8
16.52		26.04	20.21	31.35	64.29
42	30.56	81.6	34.47	79.13	43.71
29.08	20.09	16.76	31.23	21.43	44.1
19.63	28.5	37.3	45.72	43.03	46.93
0	24.5	22.61	22.57	35.71	63.53
21.3	50.29	26.56	31.2	45.46
25.2	46.77		40	31.3	37.29
	24.12				29.38
				53.11	40.64
24.32				66.32

## Sheet: G
cry-G4>mCherry CT0	cry-G4>mCherry CT12	iso>Hex-C RNAi CT0	iso>Hex-C RNAi CT12	cry-G4>Hex-C RNAi CT0	cry-G4>Hex-C RNAi CT0
25.6	27.5	21.1	38.9	6.6	16.2
10.3	20.1	15.5	26.4		20.6
30.5	27.2	16.1	26.3	5.8	34.3
28.1	32.1	26.2	34.1	9.6	32.6
	24.7	12	28.7	0	10.5
	6.7	15.7	23.7		11.2
10.7	17.1	23.4	29		8.8
16.4	40.8	20.5	35.9		35.3
14.3	38.7	22.8	27.7		24.8
				7.5
26.6	28.4		30.4	19.2	40.8
26.6	35.7		26.5	4.2	33.6
	44.7	27.7	7.3	18.2	33.5
10.5	23.1	12.3	10.8	28.7	38.9
1.8	26.7	29.5	14.4	0.2	20.8
7.8	35.3	1.6			33.6
12.8	30.1	17	40.9	36.6	42.5
21	41.4	18.6	31.7	28.9	32.8
24.7	34.2	17.1	22.8	21.8	28.7
24.3		32.7		14.8
25.1	22.8	31.2	35.5	19.6	35.5
20.3	36.1	27.3	45.2	21.4	17
28	23.8	18.9	43.4	23.5	22.4
29.2	4.6	26.2	15.9	9.4	26.2
8.8	24.6		28.8	0.7	36.9
30.6	14.5	29.6		16	32.2
19.8	42	15	6.7	23.6	41.5
	31.3	9.1	37	26.7	42.6
36.4	5.2	27.9	12.9	18	29.2
13.5		28		12.9
8.8	31.6	16	37.2	3.4
14.1	31.9		29.2		31.4
	41	38.5	27.8	11	29.4
20.6	24	36.1	34.3		7.2
	18.1	19.4	21.4	0	28.9
19.2	31.4	20.9	28.1	20.2	46.4
37.2	44		25.2	19.1	47.1
23.3	28	10.2	29.9		2.9
34.5	22.1		33.7	30.6	11.3
35.1				8.5

## Sheet: H
cry-G4>mCherry CT0	cry-G4>mCherry CT12	iso>Hex-C RNAi CT0	iso>Hex-C RNAi CT12	cry-G4>Hex-C RNAi CT0	cry-G4>Hex-C RNAi CT12
53	67	33	49	38	27
26	65	50	45		37
64	68	49	43	29	44
46	64	31	54	31	58
	52	36	42	0	49
	27	33	65		28
28	51	42	53		22
54	28	38	58		40
38	62	31	47		56
				49
52	34		37	69	43
37	50		51	11	49
	65	41	53	41	92
46	65	39	52	56	43
15	77	43	44	2	94
44	79	6			60
43	37	31	60	63	55
61	42	30	34	49	31
52	74	38	51	56	44
45		33		95
47	56	50	74	70	83
50	50	43	34	84	61
45	48	42	73	62	94
64	24	43	48	66	54
60	39		62	6	71
65	39	52		60	71
54	63	73	20	70	59
	60	34	49	75	51
48	21	33	25	45	55
50		48		57
33	58	29	63	32
37	92		54		56
	46	47	36	71	45
53	53	70	76	94	51
	55	33	81	0	94
62	49	67	82	83	61
31	61		53	51	53
71	76	20	35		12
39	42		52	80	43
51				56

## Sheet: I
cry-G4>mCherry CT0	cry-G4>mCherry CT12	iso>Hex-C RNAi CT0	iso>Hex-C RNAi CT12	cry-G4>Hex-C RNAi CT0	cry-G4>Hex-C RNAi CT0
28.98	24.63	38.36	47.63	10.42	36
23.77	18.55	18.6	35.2		33.41
28.59	24	19.71	36.7	12	46.77
36.65	30.09	50.71	37.89	18.58	33.72
	28.5	20	41	0	12.86
	14.89	28.55	21.88		24
22.93	20.12	33.43	32.83		24
18.22	87.43	32.37	37.14		52.95
22.58	37.45	44.13	35.36		26.57
				9.18
30.69	50.12		49.3	16.7	56.93
43.14	42.84		31.18	22.91	41.14
	41.26	40.54	8.26	26.63	21.85
13.7	21.32	18.92	12.46	30.75	54.28
7.2	20.81	41.16	19.64	6	13.28
10.64	26.81	16			33.6
17.86	48.81	32.9	40.9	34.86	46.36
20.66	59.14	37.2	55.94	35.39	63.48
28.5	27.73	27	26.82	23.36	39.14
32.4		59.45		9.35
32.04	24.43	37.44	28.78	16.8	25.66
24.36	43.32	38.09	79.76	15.29	16.72
37.33	29.75	27	35.67	22.74	14.3
27.38	11.5	36.56	19.88	8.55	29.11
8.8	37.85		27.87	7	31.18
28.25	22.31	34.15		16	27.21
22	40	12.33	20.1	20.23	42.2
	31.3	16.06	45.31	21.36	50.12
45.5	14.86	50.73	30.96	24	31.85
16.2		35		13.58
16	32.69	33.1	35.43	6.38
22.86	20.8		32.44		33.64
	53.48	49.15	46.33	9.3	39.2
23.32	27.17	30.94	27.08	9	8.47
	19.75	35.27	15.85	0	18.45
18.58	38.45	18.72	20.56	14.6	45.64
72	43.28		28.53	22.47	53.32
19.69	22.11	30.6	51.26	20.39	14.5
53.08	31.57		38.88	22.95	15.77
41.29				9.11

## Sheet: J
Dh44>mCherry Ct1	Dh44>mCherry Ct13	iso>Glut1 RNAi CT1	iso>Glut1 RNAi CT13	Dh44>Glut1 RNAi CT1	Dh44>Glut1 RNAi CT13
	59	30	53	55	51
	15	58	52	68	80
		51	56	37	58
	45	91	42	54	55
46	45		37	58	52
38	32	87	71	48	47
11	58	46	57	55	34
49	24	73	80	76	35
35	46	47	43	49	60
36	39	43	36	43	30
9	67	48	35	55	59
60	67	46	43	52	64
26	51	68	63	51	71
26	70	61	44	76	52
58	59		36	75	61
80	42	51	47	69	42
71	73	44	36	60	67
18	30	55	65	59	45
57	70	49		54	66
55	34	51	64	41	58
28	79	32	64	62	45
44	59	53	48	53	68
81	5	47	45	53	79
49	60	49	52	58	27
45	64	53	31	73	38
63	43	51	42	30	53
40	27	56	54	51	51
43	19	59	25	60	45
50	63	54	49	72	26
60	19	42	50	73	54
	19	54	25	52	77
57	33	61	46	37	46
69	12	37	36	48	47
76	33	50	52	62	39
41	25	35	59	56	38

[truncated: 5 more sheets: K, L, M, N, O]
