# Supplementary material for: Energetic demands regulate sleep-wake rhythm circuit development
Source: eLife. 2024 Jul 22;13:RP97256. doi: 10.7554/eLife.97256 (PMC11262794; doi:10.7554/eLife.97256)
Supplement: Figure 5—figure supplement 2—source data 1. [file elife-97256-fig5-figsupp2-data1.xlsx]

## Sheet: A
Dh44>mCherry Ct1	Dh44>mCherry Ct13	iso>GCN2 RNAi CT1	iso>GCN2 RNAi CT13	Dh44>GCN2 RNAi CT1	Dh44>GCN2 RNAi CT13
13	74	35	65		35
29	23	31	63		28
22	89	43	29		45
31	73	75	33	11	75
67	28	39	77	29	69
45	40	38	61	30	41
44	48		66	39	45
47	42	53	55	25	44
34	35	57	41	63	19
48		68		70
42	34	37	33	72	50
42	75	19	62	52	28
32	29	54	81	46	30
36	32	61	41	13	37
15	31	10	47	52	37
30	31	48	44	22
48	46		62	34	89
33	36		34	28	43
	32	55	80	33	20
42		35		37
	66	24	49	45	51
46	65	48	81	38	57
	45		65	38	34
44	51	48	88	25	43
24	45	73	65	43	55
43	36	65	66	76	36
64	67	44	37	71	60
28	41	37	69	41	42
31	56	49	73		31
48
40	44	50	37	19	57
39	54	28	54	16	62
25	39	52	34	36	41
25	36	51	41	38	47
	39	59	45	33	27
32	22	44	43	57	23
31	31	44	50		36
46	71	39	42	21	50
32	31	68	52		23
				17

## Sheet: B
Dh44>mCherry Ct1	Dh44>mCherry Ct13	iso>GCN2 RNAi CT1	iso>GCN2 RNAi CT13	Dh44>GCN2 RNAi CT1	Dh44>GCN2 RNAi CT13
9.23	22.95	17.49	29.91		59.66
23.79	8.61	45.48	37.24		69.43
32.45	17.12	45.35	68.07		39.2
34.26	17.75	24.8	66.55	27.27	28.32
29.73	76.93	24	33.04	31.45	34.87
43.47	67.8	40.74	10.72	57	52.68
37.77	54.25		24.73	45.08	37.87
39.7	50.29	46.98	42.33	54.24	34.91
21.35	66	23.79	52.68	18.76	57.79
31		15.62		20.49
35.29	40.41	46.54	63.64	26.83	45.24
44.14	32.32	34.11	27.97	38.65	64.29
63.19	32.69	29.44	31.78	38.09	43.6
38.83	71.25	23.02	77.56	30.46	54.49
18.8	26.13	15.6	23.36	19.38	41.51
30.8	30.58	31.13	36.68	43.36
32.75	48.65		20.32	49.94	19.42
46.36	52.33		70.94	45.21	42.14
	31.31	18.76	29.1	63.27	60
37.71		52.8		30.97
	34.82	25.5	35.76	45.47	55.53
34.04	28.52	25.88	16.37	22.74	37.89
	40.53		34.98	59.53	48.18
30	48.47	42.25	21.41	43.68	40.6
32.5	52.93	32.38	31.2	47.44	42.33
35.86	64.83	22.15	18.27	16.97	56.5
22.59	31.52	32.05	40.22	18.34	30.5
37.07	54	26.43	39.13	52.98	67.57
44.52	42.32	43.71	23.84		63.68
31.5
30.75	47.32	36.6	45.89	12.63	27.68
27.54	26.78	50.57	37.78	15.38	39.19
31.92	48.31	32.54	95.12	37.33	57.22
24.96	49.5	36.82	40.98	36.63	24.51
	45.54	22.68	70.4	37.82	34.67
35.06	47.73	39	24.42	23.05	32.09
65.81	42.77	43.09	36		34.33
31.83	19.35	62	46.29	22.86	42
33.19	45.29	23.56	53.42		46.43
				18

## Sheet: C
Dh44>mCherry CT1	Dh44>mCherry CT13	iso>crc CT1	iso>crc CT13	Dh44>crc CT1	Dh44>crc CT13
42	38	42	80	26	24
27	39		108	66	32
44	34	38	90	70	36
50	38	68	53	16	18
21	19	52	39	35	35
	37	28	78	18	59
52	39	42	74	35	69
33	41	54	47	48	19
38	42	75	57
51		29		13
21	39	34	65	38	29
38	25	39	54	40	63
38	20	23	44	63	41
45	27	21	47	31	61
29		15	45	7	49
19	28	36	37		31
33	52	35	47	9	45
21	47	42	37	4	116
	51	28	51	28	25
44				8
56	43	49	60	0	35
56	54	25	35	30	5
	53	36	53	24	66
54	48	35	86	49	62
46	42	17	59	50	38
41	55	39	39	26	25
43	82	45	79	55	49
33	29	38	47	13	17
82	65	34	43		37
		29
37	65	20	42	26	32
33	39	32	76	27	70
51	37	29	49		50
34	50	28	22	28	45
35	69	12	21	22	52
80	30	32	48	40	42
37		45	55	41	45
79	40	98	21	3	52
	65	56	22	5	25
68		53		29

## Sheet: D
Dh44>mCherry CT1	Dh44>mCherry CT13	iso>crc CT1	iso>crc CT13	Dh44>crc CT1	Dh44>crc CT13
33.86	76.74	40.86	29.18	27	72.5
52.44	58		18.44	20	73.69
39	56.82	51.16	19	21.6	48.67
21	54.79	24.62	40.08	18.75	43
21.43		22.73	51.69	46.46	61.89
	55.14	27.64	21.62	24.67	38.34
28.5	56.46	54	26.51	34.46	26.26
60.55	45.07	17.89	37.15	32.63	58.74
16.89	65.14	17.84	26.21
39.41		26.48		24.92
26.57	38.62	18.88	36.74	21.79	57.52
58.89	17.52	54.62	51.11	38.85	18.38
35.53	45	69.65	53.05	26.48	22.68
41.2	70.44	18.86	36.89	64.45	32.46
43.86		17.2	37.87	18	35.88
19.89	34.93	21.5	40.38		91.74
41.64	43.5	30	29.11	30	26.53
28.29	47.87	28.29	33.57	30	14.17
	33.88	9.21	20.59	55.93	12.96
27.41				24
31.71	31.67	30.37	19.1	0	57.94
28.61	47.22	26.16	71.14	39.8	48
	46.42	30.83	31.81	18.75	19.64
31.44	46.88	15.77	29.58	18.24	30.48
21.91	51.71	22.59	29.8	10.32	49.26
46.98	36.87	34.15	19.23	32.77	20.4
33.49	17.2	41.33	29.54	26.4	46.9
46.36	62.9	37.74	37.53	15.69	36
14.41	34.06	25.41	54.42		18.97
		30.41
19.46	38.86	8.4	15	33.92	20.81
37.27	72.31	26.63	26.68	49.11	27.94
38.47	62.11	18	32.33		37.92
63.18	52.56	26.14		21.64	39.07
39.09	31.48	21.5	37.14	21	30.35
20.33	91.8	21.38	19.13	26.25	54.57
33.89		29.07	50.18	34.83	29.6
28.48	41.4	19.59	16.57	12	27.58
	16.43	29.25	32.18	21.6	33.84
32.82		16.75		35.38
