# Supplementary material for: Energetic demands regulate sleep-wake rhythm circuit development
Source: eLife. 2024 Jul 22;13:RP97256. doi: 10.7554/eLife.97256 (PMC11262794; doi:10.7554/eLife.97256)
Supplement: Figure 5—source data 1. [file elife-97256-fig5-data1.xlsx]

## Sheet: A
Dh44>mCherry Ct1	Dh44>mCherry Ct13	iso>Glut1 RNAi CT1	iso>Glut1 RNAi CT13	Dh44>Glut1 RNAi CT1	Dh44>Glut1 RNAi CT13
31.7	27.2	14.3	23.5	4.4	44.5
37.6	36.4	26.6		35.2	31.5
9.8	43.7		37.7	7.2	32.8
32.2	34.6	13.4	40	31.5	38
	38.4	24.8	24.1	3.7	31
22.5	37.6	30.9	29.1	14.1	14.4
	53.3	35.2	38	27.8	31.9
36.4	49.2	12.6	36.4	20.6	32.3
23.5	19.5	26.1	14.8	9.9	41.2
15.5		16.1		8.8
21.3	41.5	15.3	22.3	11	37.5
16.9	43	30.1	39.1	34.4	30.8
28.3	41.8	11.8	30.2	30.5	36.2
25.2	32.9	27.4	28.8	29.4	35
18.4	32.5	7.3	40.8	33.6	20.5
20.4	28.2	6.9	20.2	17.9	20
10.8	33.9	12.1	20.2	40.9	42.3
10.3	28.3	30.6	39	26.8	37.1
17.1	34.9	21.5	31.4	30.5	32.2
18.8		37.4		22.4
7.1	30.7	21.9	14.8	23.2
32.1	35.2	9.8	22.1
25.3	16.3		31.2	9.9	11.6
11.5	29	18.8	22.6	30.2
14.8	43	21.7	19.1	40.6	28.7
13.8	34.5	6.3	28.4	34.4	13.2
24.7	33	25.2	11.5	47.4
14.4	39.1	18.3	26.9	31.5	17.1
4.9	28.9	26.8	18.2	36	24.4
		7		20.7
11	39.6	1		16	22.1
30.1	31.6	30.3	16.6	26.5	15.2
18.4	46.1	19.8	27.8	38.3	39
	15.7	19.4	38.9	28	35.2
27.5	16.6	20.4	17.3	18.2	27
34.7	38.4	5.4		28	32.7
28.9	31.7	11.7	28.5	15.2	31.2
41.5	38.2	25.2	28.5	42	34.2
33.4	42.1		19.9	14.1	28.7
34.5		33.9		40.5

## Sheet: B
dh44>mCherry ct0	dh44>mCherry ct12	iso>Hex-C CT0	iso>Hex-C CT12	Dh44>Hex-C CT0	Dh44>Hex-C CT12
	30.1	13.3	11.3	3.9	37.5
8.2	53.6	2.2	20.6	23.8	49.1
25.8	45.6	3.6	23	37.1	19.3
	36.1	6.6	28.6	14.3	31.9
16.8	36.9	20.7	34.7		41.8
6.3	13.9	35.4	6.1	11.1	23.9
16.8	31.3	12.4	27.8	35.8	43
27.1	29.9		55	35.2	39
27.2	21.1	17.5	26.4	35.5	11.2
32.1		1.4		21.4
22.2	27.2	6.9	24.3	10.1	25.3
5.4	30.6		31.4	37.6	18.2
7	33.1		29.1		3.4
	26.8	0.1	18.5	11.6	3.5
3.6	1.8	4.4	27.5	16.1	20.2
18	0.3	0.7	37.2	20.8	8.7
19.3	33.7	10.3	29.5	13.6	7.5
	29.7	22.6	25.7	20.1	7.3
8.6	36.5	3.6	28.6	12.5	5.2
3.3				12.5
5.2	22.3	16.7	11.4	4.9	21
10.4	42.9	12.6	14.3	21.9	1.7
0.6	33.8	16.9	5.6	19.2	35.3
12.1	37.5	13.8	18.5	35.6	25.5
1.6	1.3	1.4	8.5	19.3	0.8
8.1	27.8	3.2	10.4	14	7.8
22.9	30.6	18.4	22.6	2.6	1.2
	8.3	8.9	3.9	18.2	20.4
2.2	36.8	4.6	16	11.5
		2.7		33.2
7.3	43.4	2.3	7.3	10.1	2.7
9.3	24.1		16.6	28.6	30.5
13.5	37.8	4.2	11.1	36.9	24.4
	39	7.4	15.6	36.1	17.2
21.4	39.1	8.1	5.5	23.2	39.9
	12.9	15.2	3.1	32.2	3
10.5	42.8	28.6	16.4		11.6
13.1	40.5	20.9		34.5	27.7
17.3	24.6	1.1			10.8
35.7		11.5		24.2

## Sheet: C
Dh44>mCherry CT1	Dh44>mCherry CT13	iso>Pyk CT1	iso>Pyk CT13	Dh44>Pyk CT1	Dh44>Pyk CT13
29.6	22.7	16.3	1.2	30.9	13
26.7	42.5	4.6	35.1	18.1	5.4
	41	19	52.9	7.9	16.5
28.3	37.5	6.5	27.2		25.8
16.8	36.2	24.5	16.6	29.7	21.9
32.1	33.8	15	27.3	0.2	16.8
24	23.5	3	23.6	17.2	24.8
25.5	30.4
19.7	36.9			8.7
23.7	48.6		41.9	7.7	30.7
23.6	37.7	12.2	42.1	32.1	0
28.6	32.2	21.9	38.1	24.7	30
17.5	34.7	25.1	25.1	28.6	22.2
7.5	46.7	29.3	7.6	26.1	3.5
	34		16.7	14.4	17.8
24.7	36.7	23.9	20.1	32.4	19.2
33.3	30.8	5.1	38	25.7	30.8
10.7	45.6	30.7	7.5	40.1	30.8
33.5		4.6		30.9
12	42.1	27.3	25.7	19.9	38.2
20.5	47	20.6	42.5
32.7	38.3	13.1	37.8	28.1	10.1
35.8	43.8	27.3	36
22.8	36.2	21.2	9.6	33.1
27.1	45.9	6.5	8.7	10.3	8
20.9		34.2	40.5	25.7	26.1
37.5	27.6	21		16.5
	17.8	6.5	11.6	24.5	1.2
37.2		9.4
17.9		21.7	6.4	20.9	30
7	32.6	34	29.3	42.2	30.6
25.2	22.1	22.9	20.3	22.5	46.3
15.7	22.8	28.6	22.1	25.1	21.9
0	24.5	21.1	17.3	25	36
7.1	46.1	27	18.2	19.7
14.7	34.3		24	38.6	26.1
	20.1				14.2
	36.9			23.9	35.9
15				40.9

## Sheet: D
Dh44>mCherry	iso>Hex-C	Dh44>Hex-C
5	13	13
10	15	5
18	14	0
9	18	6
10	23	3
0	11	2
11	7	7
11	5	10
6	10	2
14	7	17
0	68	11
8	0	6
10	4	6
7	8	0
7	11	7
	4	7
	0	8
	0	12
	22	6
	5	12
	4

## Sheet: E
Dh44>mCherry Ct1	Dh44>mCherry Ct13	iso>Glut1 RNAi CT1	iso>Glut1 RNAi CT13	Dh44>Glut1 RNAi CT1	Dh44>Glut1 RNAi CT13
	37.5	8.9	43.2	28.4	42.2
	4.5	29	40.9	17.1	21.2
		32.6	38.4	31.1	9.9
	24.1	34	29.5	32.9	21.9
13.8	28.1		22.2	40	8.2
11.2	11.5	17.8	15.6	38.8	26
2.3	26	31.6	29.9	18.8	7.3
23.4	8.6	30.1	25.7	31.3	17.2
19.3	13.8	26.6	11.5	25.3	25.4
21.8	31.7	26.9	10.8	33.9	16.9
4.1	30.2	23.6	15.5	31.4	15.4
34.8	25	24.4	14	23.3	29.4
8.5	32	32.5	34.1	19.2	36.2
13	28.4	22.8	32.3	28.9	30.7
18.5	23.3		42.4	35.8	35.5
24.4	11.8	28.4	36.7	26.3	44.7
31.6	36.5	27.9	30.2	16.4	8.8
6.8	24.4	24.9	37.5	42.2	42.6
41.1	27.6	20		44.6	27.4
14.4	24.9	26	41	32.7	27.4
9.6	20	51.4	34.3	33.7	48.3
36.6	26.4	15	30.4	25.3	34.8
31.3	2	28.3	37.9	35.5	17.8
30.8	31.1	27.5	38.2	30.5	14.1
25.6	13.9	33.1	48.8	37.9	6.4
19.5	19.2	27.5	25.1	17.8	28.2
39.1	8.1	29.7	28.4	50.5	21.5
32.1	7.4	35.4	13	10.5	13.3
30.8	26.6	25.5	35.1	22.5	9.4
30	14	27.5	31.4	35.9	22
	4.8	38.8	21.9	34.5	32.8
23.9	25.3	29.9	31.1	22.3	25.5
14.7	2.4	22.9	16.6	27.6	30.1
23.9	7.3	32.9	23.9	34.2	16.7
5.1	6.1	11.6	30.2	11.6	6.5

## Sheet: F
Dh44>mCherry Ct0	Dh44>mCherry Ct12	iso>Hex-C RNAi Ct0	iso>Hex-C RNAi Ct12	Dh44>Hex-C RNAi Ct0	Dh44>Hex-C RNAi Ct12
16.1	13.5	28	23.3	17.6
9.4	12.5	31.8	28.5	18.2	13.4
15	22.6	27.8	36.3	13.2	31.3
27	23.4	32.8	24.5	34.8
19.5	13.8	26.7	29.7	33.1	35.4
32.5	9.3	17.1	25.6	24.8	20.1
20.7	16.2	21.9	22.1	26.4	16.4
1.7	4.1	13.9	22	7.9	39.1
18.4		21.6	36.1	31.2	14.3
17.4	19.7	19.1	24.2	3.4	42.2
21.1	16	24.1	24.2	24.8	27
6.4	34.5	27.5	23.4	23.6	32.3
5.1	25.1	25.8	29.9	38.9	35.2
10.2	17.7	22.5	9.4	6.8	18.7
3	2	3.3	12.5	26.5	13.9
21.7	15.1	25.4	11.7	21.7	4.8
18.5	3.6	26.3	32.1	27.8	22.4
24.2	19.4	9.3	15.5	23.7
14.6	8.8	27	28.7	27.1	10.1
18.5	31.1	12.5	25.3	15.2	5.8
6	3.2	28.7	20.6	15.2	27.2
13.7	7.3	20.2	18.9	30	33.6
19.3	18.5	19.4	25.2	5.3	18
24.9	6.1	18.1	23.2	21.2	10.5
7.6	1.9	26.3	23.4	23.1	20.1
18.6	21.2	25.1	17.7		9.6
15.6	26.4	24.5	24.2	9.4	11.1
18.1	22.2	5.2	24	26.1	9.6

## Sheet: G
Dh44>mCherry CT1	Dh44>mCherry CT13	iso>Pyk CT1	iso>Pyk CT13	Dh44>Pyk CT1	Dh44>Pyk CT13
36.2	34.1	19.8	4.1	31.5	10.4
28.3	22.3	10.7	3.3	24.6	15.4
19.3	26.5	23.5	26.9	26.3	37.2
8.7		23.4	34	21.7
37.4	32.7	23.9	31.6	42.1	28.6
11.6	28.3	27.2	31.4	22.9	14.3
29.5	35.5	32.2	12.5	44.6	7
26.2	39.1	33.1	33.6	20.2	26.5
2.6	5.6	28.6	20.9	24.9	22.7
15	33.2	36.5	16.6	41.4	20.4
12.7	24.8	25	31.1	33.3	30.1
36.9	22.6	39.6	29.6	38.6	23.9
17	29.7	11.6	15.3	44.6	29.9
21.9	14.2	35.4		35.9	6.7
36	26.8	22	27.9	17.1	1.7
30.3	20.9	26.2	31.8	17.2	17.3
16.9	30.9	39.4	28.1	33.2	12
17	30.2	16.5	22.8	26.1	5.9
	14.8	21.4	31.2	18.1	7.9
15.6	21.3	16.2	12.4	22.2
16.6	28.4	18.1	14.2	20.2	36.3
38.4	24.2	15.6	13.6	14.2	24.9
34.2	30.2	26.1	18.6	23	26.9
14.1	23.6	37.8	32.3	16	12.7
5.8	15.7	21.3	28.2	25.7	12.9
18	16.4			25.5	5.2
17.2	27.7				5.3
19.3	12.3			22.7	31.8

## Sheet: H
Dh44>mCherry Ct1	Dh44>mCherry Ct13	iso>GCN2 RNAi CT1	iso>GCN2 RNAi CT13	Dh44>GCN2 RNAi CT1	Dh44>GCN2 RNAi CT13
2	28.3	10.2	32.4		34.8
11.5	3.3	23.5	39.1		32.4
11.9	25.4	32.5	32.9		29.4
17.7	21.6	31	36.6	5	35.4
33.2	35.9	15.6	42.4	15.2	40.1
32.6	45.2	25.8	10.9	28.5	36
27.7	43.4		27.2	29.3	28.4
31.1	35.2	41.5	38.8	22.6	25.6
12.1	38.5	22.6	36	19.7	18.3
24.8		17.7		23.9
24.7	22.9	28.7	35	32.2	37.7
30.9	40.4	10.8	28.9	33.5	30
33.7	15.8	26.5	42.9	29.2	21.8
23.3	38	23.4	53	6.6	33.6
4.7	13.5	2.6	18.3	16.8	25.6
15.4	15.8	24.9	26.9	15.9
26.2	37.3		21	28.3	28.8
25.5	31.4		40.2	21.1	30.2
	16.7	17.2	38.8	34.8	20
26.4		30.8		19.1
	38.3	10.2	29.2	34.1	47.2
26.1	30.9	20.7	22.1	14.4	36
	30.4		37.9	37.7	27.3
22	41.2	33.8	31.4	18.2	29.1
13	39.7	39.4	33.8	34	38.8
25.7	38.9	24	20.1	21.5	33.9
24.1	35.2	23.5	24.8	21.7	30.5
17.3	36.9	16.3	45	36.2	47.3
23	39.5	35.7	29		32.9
25.2
20.5	34.7	30.5	28.3	4	26.3
17.9	24.1	23.6	34	4.1	40.5
13.3	31.4	28.2	53.9	22.4	39.1
10.4	29.7	31.3	28	23.2	19.2
	29.6	22.3	52.8	20.8	15.6
18.7	17.5	28.6	17.5	21.9	12.3
34	22.1	31.6	30		20.6
24.4	22.9	40.3	32.4	8	35
17.7	23.4	26.7	46.3		17.8
				5.1

## Sheet: I
Dh44>mCherry CT1	Dh44>mCherry CT13	iso>crc CT1	iso>crc CT13	Dh44>crc CT1	Dh44>crc CT13
23.7	48.6	28.6	38.9	11.7	29
23.6	37.7		33.2	22	39.3
28.6	32.2	32.4	28.5	25.2	29.2
17.5	34.7	27.9	35.4	5	12.9
7.5	46.7	19.7	33.6	27.1	36.1
	34	12.9	28.1	7.4	37.7
24.7	36.7	37.8	32.7	20.1	30.2
33.3	30.8	16.1	29.1	26.1	18.6
10.7	45.6	22.3	24.9
33.5		12.8		5.4
9.3	25.1	10.7	39.8	13.8	27.8
37.3	7.3	35.5	46	25.9	19.3
22.5	15	26.7	38.9	27.8	15.5
30.9	31.7	6.6	28.9	33.3	33
21.2		4.3	28.4	2.1	29.3
6.3	16.3	12.9	24.9		47.4
22.9	37.7	17.5	22.8	4.5	19.9
9.9	37.5	19.8	20.7	2	27.4
	28.8	4.3	17.5	26.1	5.4
20.1				3.2
29.6	22.7	24.8	19.1	0	33.8
26.7	42.5	10.9	41.5	19.9	4
	41	18.5	28.1	7.5	21.6
28.3	37.5	9.2	42.4	14.9	31.5
16.8	36.2	6.4	29.3	8.6	31.2
32.1	33.8	22.2	12.5	14.2	8.5
24	23.5	31	38.9	24.2	38.3
25.5	30.4	23.9	29.4	3.4	10.2
19.7	36.9	14.4	39		11.7
		14.7
12	42.1	2.8	10.5	14.7	11.1
20.5	47	14.2	33.8	22.1	32.6
32.7	38.3	8.7	26.4		31.6
35.8	43.8	12.2	45.7	10.1	29.3
22.8	36.2	4.3	13	7.7	26.3
27.1	45.9	11.4	15.3	17.5	38.2
20.9		21.8	46	23.8	22.2
37.5	27.6	32	5.8	0.6	23.9
	17.8	27.3	11.8	1.8	14.1
37.2		14.8		17.1
